# Supplementary material for: Immobilising an acid-cleavable dimeric phthalocyanine on gold nanobipyramids for intracellular pH detection and photodynamic elimination of cancer cells
Source: Royal Society of Chemistry journal article supplement (doi:10.1039/d4an00420e), 2024-01-01
Supplement: d4an00420e1.pdf [file d4an00420e1.pdf]

## Electronic Supplementary Information

### **Immobilising an acid-cleavable dimeric phthalocyanine on gold nanobipyramids for intracellular pH detection and photodynamic elimination of cancer cells**

Yue Cao,<sup>‡ab</sup> Roy C. H. Wong,<sup>‡b</sup> Evelyn Y. Xue,<sup>b</sup> Han Zhang,<sup>c</sup> Jie Wang,<sup>a</sup> Yan Ding,<sup>a</sup> Lei

Zhang,<sup>d</sup> Feng Chen,<sup>a</sup> Jianfang Wang<sup>c</sup> and Dennis K. P. Ng<sup>\*b</sup>

<sup>a</sup> *Department of Forensic Medicine, Nanjing Medical University, Nanjing, 211166, China*

<sup>b</sup> *Department of Chemistry, The Chinese University of Hong Kong, Shatin, N.T., Hong Kong, China. E-mail: dkpn@cuhk.edu.hk*

<sup>c</sup> *Department of Physics, The Chinese University of Hong Kong, Shatin, N.T., Hong Kong, China*

<sup>d</sup> *State Key Laboratory of Organic Electronics and Information Displays & Institute of Advanced Materials, Nanjing University of Posts & Telecommunications, Nanjing, 210023, China.*

<sup>‡</sup> These authors contributed equally to this work.

## Contents

### Experimental section

**Scheme S1** Synthetic route for dimeric phthalocyanine **1**.

**Fig. S1** (A) Fluorescence spectra of **1** in PBS with 0.3% Tween 80 (v/v) at different concentrations ( $\lambda_{\text{ex}} = 610$  nm). (B) Plot of the fluorescence intensity at 690 nm versus the concentration of **1** in PBS.

**Fig. S2** (A) Change in SERS spectrum of **1@AuBP** (2.3 nM) in PBS with 0.15% Tween 80 (v/v) over a period of 24 h at room temperature. (B) Variation of the SERS intensity of **1@AuBP** at  $1203\text{ cm}^{-1}$  over a period of 24 h at room temperature.

**Fig. S3** (A) Fluorescence ( $\lambda_{\text{ex}} = 610$  nm) and (B) SERS spectra of **1@AuBP** (2.3 nM) in PBS at different pH: (a) 7.4, (b) 6.5, (c) 6, (d) 5.5 and (e) 5. The spectra were recorded at 24 h after adjusting the pH.

**Fig. S4** Changes in (A) fluorescence ( $\lambda_{\text{ex}} = 610$  nm) and (B) SERS spectra of **1@AuBP** (2.3 nM) in PBS at pH 5 over a period of 24 h. The SERS spectra were recorded at (a) 0 min, (b) 30 min, (c) 1 h, (d) 2 h, (e) 5 h, (f) 7 h, (g) 12 h and (h) 24 h after preparing the solution.

**Fig. S5** (A) Bright-field, fluorescence and the merged confocal images of MCF-7 cells after incubation with **1@AuBP** in PBS (2.3 nM, 200  $\mu\text{L}$ ) for different periods of time. Scale bar: 25  $\mu\text{m}$ . (B) Corresponding quantified fluorescence intensities. (C) SERS spectra recorded after incubating MCF-7 cells with **1@AuBP** in PBS (2.3 nM, 200  $\mu\text{L}$ ) for different periods of time: (a) 0 min, (b) 1 h, (c) 1.5 h, (d) 2 h, (e)

3 h and (f) 4 h.

**Fig. S6** (A) Bright-field, fluorescence and the merged confocal images of MCF-7 cells after incubation with nigericin (10 nM) for 30 min, followed by incubation with **1@AuBP** (2.3 nM) in PBS at pH 7.4 or 5.0 for 2 h. Scale bar: 25  $\mu\text{m}$ . (B) SERS spectra of MCF-7 cells after incubation with nigericin (10 nM) for 30 min, followed by incubation with **1@AuBP** (2.3 nM) in PBS at pH (a) 7.4, (b) 6.5, (c) 6, (d) 5.5 and (e) 5 for 2 h. (C) Quantified intracellular fluorescence intensities of MCF-7 cells after incubation with nigericin (10 nM) for 30 min, followed by incubation with **1@AuBP** (2.3 nM) in PBS at different pH for 2 h. (D) Plots of the ratiometric intensities of  $I_{1087}/I_{830}$  and  $I_{1203}/I_{830}$  versus the pH of the medium.

**Fig. S7** (A) Bright-field, fluorescence and the merged confocal images of MCF-7 cells after incubation with nigericin (10 nM) for 30 min, followed by incubation with **1@AuBP** (2.3 nM) in PBS at pH 5.0 for 4 h. Scale bar: 25  $\mu\text{m}$ . (B) The corresponding Raman images. Scale bar: 10  $\mu\text{m}$ . (C) Raman spectra collected in the (a) red, (b) yellow and (c) green colour regions of the MCF-7 cell shown in (B).

**Fig. S8** Cytotoxicity of **1@AuBP** against MCF-7 cells upon incubation for 12 h both in the absence and presence of light ( $\lambda > 610 \text{ nm}$ ,  $40 \text{ mW cm}^{-2}$ ,  $48 \text{ J cm}^{-2}$ ).

**Fig. S9**  $^1\text{H}$  (top) and  $^{13}\text{C}\{^1\text{H}\}$  (bottom) NMR spectra of **2** in  $\text{CDCl}_3$ .

**Fig. S10** ESI mass spectrum of **2**.

**Fig. S11**  $^1\text{H}$  (top) and  $^{13}\text{C}\{^1\text{H}\}$  (bottom) NMR spectra of **5** in  $\text{CDCl}_3$ .

- Fig. S12** ESI mass spectrum of **5**.
- Fig. S13**  $^1\text{H}$  (top) and  $^{13}\text{C}\{^1\text{H}\}$  (bottom) NMR spectra of **6** in  $\text{CDCl}_3$  with a trace amount of pyridine- $\text{d}_5$ .
- Fig. S14** ESI mass spectrum of **6**.
- Fig. S15**  $^1\text{H}$  (top) and  $^{13}\text{C}\{^1\text{H}\}$  (bottom) NMR spectra of **1** in  $\text{CDCl}_3$  with a trace amount of pyridine- $\text{d}_5$ .
- Fig. S16** ESI mass spectrum of **1**.
- Table S1** Experimental and calculated SERS bands of **1@AuBP** and the corresponding assignments.

## Experimental section

### General

*N,N*-Dimethylformamide (DMF) and 1-pentanol were distilled under reduced pressure from barium oxide and sodium respectively. Tetrahydrofuran (THF) was purified using an INERT solvent purification system. All other solvents and reagents were of reagent grade and used as received. All aqueous solutions were prepared using ultrapure water (18 M $\Omega$ , Milli-Q, Millipore). All the reactions were performed under an atmosphere of nitrogen and monitored by thin-layer chromatography (TLC; Merck precoated silica gel 60F<sub>254</sub> plates). Chromatographic purification was performed with column chromatography on silica gel (Macherey-Nagel, 230-400 mesh) and/or size-exclusion chromatography on Bio-Beads S-X1 beads (200-400 mesh) with the indicated eluents. Compounds **3**<sup>R1</sup> and **4**<sup>R2</sup> and AuBPs<sup>R3</sup> were prepared according to the literature procedure.

<sup>1</sup>H and <sup>13</sup>C{<sup>1</sup>H} NMR spectra were recorded on a Bruker AVANCE III 400 NMR spectrometer (<sup>1</sup>H, 400 MHz; <sup>13</sup>C, 100.6 MHz) or a Bruker AVANCE III HD 500 NMR spectrometer (<sup>1</sup>H, 500 MHz; <sup>13</sup>C, 125.8 MHz) in CDCl<sub>3</sub> unless otherwise stated. Spectra were referenced internally by using the residual solvent (for <sup>1</sup>H,  $\delta$  = 7.26) or solvent (for <sup>13</sup>C,  $\delta$  = 77.2) resonance relative to SiMe<sub>4</sub>. Electrospray ionisation (ESI) mass spectra were recorded on a Thermo Finnigan MAT 95 XL mass spectrometer. For accurate mass measurements, the lowest *m/z* value of the isotopic envelope was reported and compared with the theoretical value. UV-Vis and steady-state fluorescence spectra were taken on a Cary 5G UV-Vis-near-IR spectrophotometer and a Hitachi F-7000 spectrofluorometer respectively.

Transmission electron microscopy (TEM) images were obtained on a FEI Tecnai G2 Spirit transmission electron microscope operated at 120 keV acceleration voltage. The dark-field images were obtained by an inverted microscope (eclipse Ti-U, Nikon, Japan) equipped with a dark-field condenser ( $0.8 < \text{NA} < 0.95$ ) and a 40 $\times$  objective lens ( $\text{NA} = 0.8$ ), and a white light source (100 W halogen lamp) was used to excite the plasmon resonance scattering light of AuBPs. The fluorescence images were obtained on the same microscope using a mercury lamp (100 W Epi illuminator) as the excitation light source. Raman spectra were recorded on a Raman microspectrometer with an inverted microscope (Ti2-U, Nikon, Japan) and a Raman spectrograph (HRS-300S, TPI, USA). The system was equipped with a class IIIB laser (785 nm, 80 mW) with a 60 $\times$  objective lens. The Raman cell images were obtained on a laser scanning confocal microscope (XploRA PLUS, Horiba, Japan). The fluorescence cell images were obtained on an Olympus FV1000 IX81-SIM confocal microscope equipped with a 635 nm diode laser. MTT assay was performed on a Tecan Spark 10 M microplate reader.

## Preparation of **2**

A mixture of **3** (50 mg, 0.12 mmol) and thioacetic acid (26  $\mu\text{L}$ , 0.37 mmol) in acetone (20 mL) was heated under reflux for 1 h. The solvent was then removed under reduced pressure. The residue was purified by column chromatography using  $\text{CH}_2\text{Cl}_2/\text{Et}_3\text{N}$  (100:1 v/v) as the eluent to afford the product as a colourless oil (42 mg, 85%).  $^1\text{H}$  NMR (400 MHz):  $\delta$  7.34 (d,  $J = 8.8$  Hz, 2 H, ArH), 6.90 (d,  $J = 8.8$  Hz, 2 H, ArH), 5.46 (s, 1 H, acetal-H), 4.10 (t,  $J = 6.4$  Hz, 2 H,  $\text{OCH}_2$ ), 3.57-3.63 (m, 2 H, OCH), 3.47-3.53 (m, 2 H, OCH), 3.42 (t,  $J = 6.8$  Hz, 4 H,  $\text{CH}_2\text{N}_3$ ),

3.27 (t,  $J = 6.4$  Hz, 2 H, SCH<sub>2</sub>), 2.37 (s, 3H, CH<sub>3</sub>) 1.86 (quintet,  $J = 6.4$  Hz, 4 H, CH<sub>2</sub>). <sup>13</sup>C{<sup>1</sup>H} NMR (100.6 MHz):  $\delta$  195.5, 158.7, 131.1, 128.0, 114.4, 101.7, 66.6, 62.1, 48.6, 30.7, 29.2, 28.6. HRMS (ESI):  $m/z$  calcd for C<sub>17</sub>H<sub>24</sub>N<sub>6</sub>NaO<sub>4</sub>S [M+Na]<sup>+</sup> 431.1472, found 431.1468.

### Preparation of phthalonitrile 5

A mixture of **4** (900 mg, 3.87 mmol), 4-nitrophthalonitrile (805 mg, 4.65 mmol) and K<sub>2</sub>CO<sub>3</sub> (803 mg, 5.81 mmol) in DMF (50 mL) was stirred at 70 °C overnight. The solvent was then removed under vacuum. The residue was redissolved in CH<sub>2</sub>Cl<sub>2</sub>. The solution was then loaded onto a silica gel column using CH<sub>2</sub>Cl<sub>2</sub>/MeOH (20:1 v/v) as the eluent to afford the product as a colourless oil (300 mg, 22%). <sup>1</sup>H NMR (400 MHz):  $\delta$  7.70 (d,  $J = 8.0$  Hz, 1 H, ArH), 7.31 (d,  $J = 1.6$  Hz, 1 H, ArH), 7.23 (dd,  $J = 1.6$  and 8.0 Hz, 1 H, ArH), 4.19-4.23 (m, 4 H, CH<sub>2</sub>), 3.87-3.90 (m, 2 H, CH<sub>2</sub>), 3.65-3.72 (m, 12 H, CH<sub>2</sub>), 2.42 (t,  $J = 2.0$  Hz, 1 H, C $\equiv$ CH). <sup>13</sup>C{<sup>1</sup>H} NMR (100.6 MHz):  $\delta$  162.1, 135.3, 119.9, 119.7, 117.5, 115.8, 115.4, 74.7, 71.1, 70.8, 70.7, 70.5, 69.4, 69.3, 68.8., 58.5. HRMS (ESI):  $m/z$  calcd for C<sub>19</sub>H<sub>22</sub>N<sub>2</sub>NaO<sub>5</sub> [M+Na]<sup>+</sup> 381.1421, found 381.1417.

### Preparation of phthalocyanine 6

A mixture of alkynyl phthalonitrile **5** (300 mg, 0.84 mmol), phthalonitrile (1.07 g, 8.35 mmol) and anhydrous zinc acetate (767 mg, 4.18 mmol) in 1-pentanol (150 mL) was heated to 80 °C. 1,8-Diazabicyclo[5.4.0]undec-7-ene (DBU) (375  $\mu$ L, 2.51 mmol) was then added, and the mixture was stirred at 140 °C overnight. After brief cooling, the volatiles were removed under

reduced pressure. The residue was dissolved in  $\text{CH}_2\text{Cl}_2$  (100 mL), and the solution was filtered. The filtrate was collected and evaporated under reduced pressure. The residue was purified by flash column chromatography on silica gel using  $\text{CH}_2\text{Cl}_2/\text{MeOH}$  (50:1 v/v) as the eluent, followed by size-exclusion chromatography using THF as the eluent. The crude product was further purified by silica gel column chromatography using  $\text{CH}_2\text{Cl}_2/\text{MeOH}$  (50:1 v/v) as the eluent. The purified product was recrystallised from  $\text{CH}_2\text{Cl}_2$  and hexane to give a dark green solid (66 mg, 10%).  $^1\text{H}$  NMR (500 MHz,  $\text{CDCl}_3$  with a trace amount of pyridine- $d_5$ ):  $\delta$  9.02-9.17 (m, 6 H, Pc- $\text{H}_\alpha$ ), 8.82 (d,  $J = 8.0$  Hz, 1 H, Pc- $\text{H}_\alpha$ ), 8.36 (d,  $J = 1.5$  Hz, 1 H, Pc- $\text{H}_\alpha$ ), 7.95-8.04 (m, 6 H, Pc- $\text{H}_\beta$ ), 7.48 (dd,  $J = 1.5$  and 9.0 Hz, 1 H, Pc- $\text{H}_\beta$ ), 4.61 (t,  $J = 4.5$  Hz, 2 H,  $\text{CH}_2$ ), 4.18-4.21 (m, 4 H,  $\text{CH}_2$ ), 3.96 (t,  $J = 4.5$  Hz, 2 H,  $\text{CH}_2$ ), 3.85 (t,  $J = 4.5$  Hz, 2 H,  $\text{CH}_2$ ), 3.78-3.80 (m, 2 H,  $\text{CH}_2$ ), 3.72-3.75 (m, 6 H,  $\text{CH}_2$ ), 2.44 (t,  $J = 2.5$  Hz, 1 H,  $\text{C}\equiv\text{CH}$ ).  $^{13}\text{C}\{^1\text{H}\}$  NMR (125.8 MHz,  $\text{CDCl}_3$  with a trace amount of pyridine- $d_5$ ):  $\delta$  160.5, 153.5, 153.3, 153.2, 152.8, 152.7, 140.3, 138.4, 138.3, 138.1, 131.6, 128.9, 128.8, 128.7, 123.5, 122.5, 122.4, 118.4, 105.4, 79.8, 74.7, 71.2, 71.0, 70.9, 70.8, 70.6, 70.2, 69.3, 68.2, 58.6 (some of the signals were overlapped). HRMS (ESI):  $m/z$  calcd for  $\text{C}_{43}\text{H}_{34}\text{N}_8\text{NaO}_5\text{Zn}$   $[\text{M}+\text{Na}]^+$  829.1836, found 829.1830.

### Preparation of dimeric phthalocyanine 1

A mixture of CuI (2 mg, 11  $\mu\text{mol}$ ) and  $\text{Et}_3\text{N}$  (14  $\mu\text{L}$ , 0.1 mmol) in DMF (2 mL) was prepared. This mixture (20  $\mu\text{L}$ ) was then added to a dispersion of **2** (10 mg, 24  $\mu\text{mol}$ ) and **6** (49 mg, 61  $\mu\text{mol}$ ) in DMF (5 mL). The resulting mixture was stirred at room temperature for 24 h. The

solvent was then removed in vacuo. The residue was purified by flash column chromatography on silica gel using CH<sub>2</sub>Cl<sub>2</sub>/MeOH (20:1 v/v) as the eluent, followed by size-exclusion chromatography using THF as the eluent. The crude product was further purified by silica gel column chromatography using CH<sub>2</sub>Cl<sub>2</sub>/MeOH (20:1 v/v) with a small amount of Et<sub>3</sub>N as the eluent. The purified product was recrystallised from CH<sub>2</sub>Cl<sub>2</sub> and hexane to give a dark green solid (15 mg, 31%). <sup>1</sup>H NMR (400 MHz, CDCl<sub>3</sub> with a trace amount of pyridine-d<sub>5</sub>): δ 8.87-9.03 (m, 12 H, Pc-H<sub>α</sub>), 8.59 (d, *J* = 4.4 Hz, 2 H, Pc-H<sub>α</sub>), 8.09 (s, 2 H, Pc-H<sub>α</sub>), 7.84-7.98 (m, 12 H, Pc-H<sub>β</sub>), 7.42 (s, 2 H, triazole-H), 7.34 (d, *J* = 4.4 Hz, 2 H, Pc-H<sub>β</sub>), 7.12 (d, *J* = 6.8 Hz, 2 H, ArH), 6.76 (d, *J* = 6.8 Hz, 2 H, ArH), 5.18 (s, 1 H, acetal-H), 4.53-4.57 (m, 4 H, CH<sub>2</sub>), 4.47-4.50 (m, 4 H, CH<sub>2</sub>), 4.23 (t, *J* = 4.0 Hz, 4 H, CH<sub>2</sub>), 4.17-4.19 (m, 4 H, CH<sub>2</sub>), 3.96-3.98 (m, 6 H, CH<sub>2</sub>), 3.86 (t, *J* = 4.0 Hz, 4 H, CH<sub>2</sub>), 3.78 (t, *J* = 4.0 Hz, 4 H, CH<sub>2</sub>), 3.71 (t, *J* = 4.0 Hz, 4 H, CH<sub>2</sub>), 3.63-3.66 (m, 8 H, CH<sub>2</sub>), 3.30-3.32 (m, 2 H, CH<sub>2</sub>), 3.17-3.19 (m, 4 H, CH<sub>2</sub>), 2.31 (s, 3 H, CH<sub>3</sub>), 1.92-1.94 (m, 4 H, CH<sub>2</sub>). <sup>13</sup>C {<sup>1</sup>H} NMR (100.6 MHz, CDCl<sub>3</sub> with a trace amount of pyridine-d<sub>5</sub>): δ 195.5, 160.2, 158.6, 153.0, 152.9, 152.8, 152.4, 152.3, 152.2, 144.9, 139.9, 138.2, 138.1, 138.0, 137.8, 131.3, 128.8, 128.7, 128.6, 128.5, 127.8, 125.6, 122.9, 122.4, 122.3, 122.2, 118.0, 114.3, 105.0, 101.7, 71.2, 70.9, 70.8, 70.6, 70.1, 69.8, 68.1, 66.5, 64.5, 61.6, 47.2, 34.3, 30.7, 30.4, 30.2, 28.5 (some of the signals were overlapped). HRMS (ESI): *m/z* calcd for C<sub>103</sub>H<sub>92</sub>N<sub>22</sub>NaO<sub>14</sub>SZn [M+Na]<sup>+</sup> 2047.5351, found 2047.5344.

### Preparation of 1@AuBP

A suspension of AuBPs (2.3 nM, 500 μL) was mixed with **1** in phosphate-buffered saline (PBS)

(3  $\mu$ M, 500  $\mu$ L) in the presence of 0.3% Tween 80 (v/v), and the mixture was stirred at room temperature overnight. PBS (0.1 mL) containing 2 M NaCl (5  $\mu$ L) was then added to stabilise the nanoparticles. The mixture was centrifuged, and the nanoparticles collected were washed with PBS twice. The resulting nanoparticles were resuspended in PBS (1 mL) for further use.

### **pH-Responsive studies in solution**

A stock solution of **1**@AuBP in PBS (2.3 nM) at pH 7.4 was prepared. Its pH was adjusted to different values (6.5, 6.0, 5.5 and 5.0) with 0.1 M HCl. The fluorescence spectra of these solutions were then recorded (from 630-800 nm) upon excitation at 610 nm. For the solution at pH 5.0, the fluorescence spectra were also recorded at different time points over a period of 24 h. The SERS spectra were recorded with a detection time of 10 s.

### **Density functional theory calculations**

DFT calculations were performed using the Gaussian 09 suite of programme<sup>R4</sup> at the level of B3LYP/3-21g to simulate the Raman spectra. Regarding the effect of the aqueous environment, the integral equation formalism version of polarisable continuum model (IEF-PCM)<sup>R5</sup> implemented in Gauss 09 was included for the geometry optimisation and the vibrational frequency calculations of the most stable geometry. The Raman shifts were achieved based on all the calculated vibrational frequencies which were scaled by a factor of 0.967<sup>R6</sup> according to the utilised functional and basis set. The vibrational modes corresponding to the calculated peaks were subsequently analysed.

### **Cell lines and culture conditions**

MCF-7 and Huh7 cells were maintained in Dulbecco's Modified Eagle Medium (DMEM) (ThermoFisher Scientific, cat. no. 12100-046) supplemented with fetal bovine serum (FBS) (10%, Invitrogen, cat. no. 10270-106) and penicillin-streptomycin (100 units mL<sup>-1</sup> and 100 µg mL<sup>-1</sup> respectively). The cells were grown at 37 °C in a humidified 5% CO<sub>2</sub> atmosphere.

### **In vitro pH-responsive studies**

Approximately  $1 \times 10^6$  MCF-7 cells in DMEM (0.5 mL) were seeded on a confocal dish and incubated overnight at 37 °C with 5% CO<sub>2</sub>. **1@AuBP** in PBS at pH 7.4 (2.3 nM, 200 µL) was then added into each cell-adhered dish for incubation at 37 °C for different periods of time. The cells were examined with an inverted microscope with an external triple channel optical system for confocal imaging. The detection time for all the SERS spectra was 10 s. To examine the pH effect, approximately  $5 \times 10^5$  MCF-7 cells per well in the culture medium were seeded on 6-well plates and incubated overnight at 37 °C under 5% CO<sub>2</sub>. The cells were first incubated with nigericin (10 nM) for 30 min. After being rinsed with PBS twice, the cells were incubated with **1@AuBP** in PBS at 7.4, 6.5, 6.0, 5.5 and 5.0 (2.3 nM, 200 µL) for 2 h. The confocal images and Raman spectra were then recorded as described above.

### **Photocytotoxicity assay**

The cytotoxicity of **1@AuBP** against MCF-7 cells was examined by a MTT assay.<sup>R7</sup> Approximately  $3 \times 10^5$  MCF-7 cells in DMEM were inoculated per well in 96-well plates and incubated overnight at 37 °C in a humidified 5% CO<sub>2</sub> atmosphere. **1@AuBP** was diluted to different concentrations with the culture medium. The cells were incubated with 100 µL of these solutions for 12 h at 37 °C under 5% CO<sub>2</sub>. The cells were then rinsed with PBS and refed with 100 µL of the culture medium before being illuminated at ambient temperature. The light source consisted of a 300 W halogen lamp, a water tank for cooling and a colour glass filter

(Newport) cut on at  $\lambda = 610$  nm. The fluence rate ( $\lambda > 610$  nm) was  $40 \text{ mW cm}^{-2}$ . Illumination of 20 min led to a total fluence of  $48 \text{ J cm}^{-2}$ . After illumination, the cells were incubated at  $37^\circ\text{C}$  under 5%  $\text{CO}_2$  overnight. The medium was discarded, and a fresh medium ( $50 \mu\text{L}$ ) containing MTT ( $0.5 \text{ mg mL}^{-1}$ ) was added to each well, followed by incubation for 4 h under the same environment. The medium was removed, and the purple formazan crystals were dissolved with dimethyl sulfoxide ( $100 \mu\text{L}$ ). The absorbance at 540 nm was measured using a Bio-Rad microplate reader. The average absorbance of the blank wells, which did not contain the cells, was subtracted from the readings of other wells. The relative cell viability (%) was calculated by  $[\sum (A_{\text{test}}/A_{\text{control}} \times 100)]/n$ , where  $A_{\text{test}}$  is the absorbance of the  $i^{\text{th}}$  datum ( $i = 1, 2, \dots, n$ ),  $A_{\text{control}}$  is the average absorbance of control wells in which the photosensitiser was absent, and  $n (= 4)$  is the number of data points.

#### **CCK-8 assay and EdU incorporation assay**

The cell viability against Huh7 cells was assessed using the cell counting kit-8 (CCK-8, Dojindo). The cells were seeded in 96-well plates and cultured overnight. They were then incubated with different concentrations of **1@AuBP** for 12 h, followed by light irradiation ( $\lambda > 610$  nm, 20 min). After that,  $10 \mu\text{L}$  of CCK-8 solution diluted with  $90 \mu\text{L}$  of DMEM was added into each well. The optical density at 450 nm was then measured by a spectrophotometer. Cell proliferation was further determined by incorporation of 5-ethynyl-2'-deoxyuridine (EdU) with an EdU cell proliferation assay kit (RiboBio). Briefly,  $4 \times 10^4$  Huh7 cells per well were seeded in a 24-well plate and left to adhere for 12 h. Culture medium with or without **1@AuBP** ( $0.23 \text{ nM}$ ) was added, and then the cells were incubated for 8 h. The cells were then rinsed with fresh medium before being illuminated using the above-mentioned light source for 20 min. After 12

h, the culture medium was replaced with a fresh medium containing 50  $\mu$ M EdU. After incubation for 4 h, the cells were rinsed with PBS twice and fixed using 4% (w/v) paraformaldehyde in PBS. The analysis was then conducted according to the manufacturer's protocol. The images were obtained on a EVOS cell imaging system (Life Technologies) automatically with 8-10 frames taken per well. The images were analysed using the ImageJ software.

### **TUNEL assay**

Cell apoptosis was studied using a TUNEL FITC apoptosis detection kit (Vazyme). In brief,  $1 \times 10^5$  Huh7 cells per well were seeded in a 24-well plate and left to adhere for 12 h. Culture medium with or without **1@AuBP** (0.23 nM) was added, and then the cells were incubated for 8 h. After replacing the medium with a fresh medium, the cells were illuminated for 20 min using the light source described above. After 12 h, the cells were rinsed with PBS twice and fixed using 4% (w/v) paraformaldehyde in PBS. The analysis was then conducted according to the manufacturer's protocol. The images were obtained on a EVOS cell imaging system (Life Technologies) automatically with 8-10 frames taken per well. The images were analysed using the ImageJ software.

### **References**

- R1 R. C. H. Wong, S. Y. S. Chow, S. Zhao, W.-P. Fong, D. K. P. Ng and P.-C. Lo, *ACS Appl. Mater. Interfaces*, 2017, **9**, 23487–23496.

- R2 J. Huang, F. Wu, Y. Yu, H. Huang, S. Zhang and J. You, *Org. Biomol. Chem.*, 2017, **15**, 4798–4802.
- R3 Q. Li, X. Zhuo, S. Li, Q. Ruan, Q. H. Xu and J. Wang, *Adv. Opt. Mater.*, 2015, **3**, 801–812.
- R4 M. J. Frisch, G. W. Trucks, H. B. Schlegel, G. E. Scuseria, M. A. Robb, J. R. Cheeseman, G. Scalmani, V. Barone, B. Mennucci, G. A. Petersson, H. Nakatsuji, M. Caricato, X. Li, H. P. Hratchian, A. F. Izmaylov, J. Bloino, G. Zheng, J. L. Sonnenberg, M. Hada, M. Ehara, K. Toyota, R. Fukuda, J. Hasegawa, M. Ishida, T. Nakajima, Y. Honda, O. Kitao, H. Nakai, T. Vreven, J. A. Montgomery Jr., J. E. Peralta, F. Ogliaro, M. Bearpark, J. J. Heyd, E. Brothers, K. N. Kudin, V. N. Staroverov, R. Kobayashi, J. Normand, K. Raghavachari, A. Rendell, J. C. Burant, S. S. Iyengar, J. Tomasi, M. Cossi, N. Rega, J. M. Millam, M. Klene, J. E. Knox, J. B. Cross, V. Bakken, C. Adamo, J. Jaramillo, R. Gomperts, R. E. Stratmann, O. Yazyev, A. J. Austin, R. Cammi, C. Pomelli, J. W. Ochterski, R. L. Martin, K. Morokuma, V. G. Zakrzewski, G. A. Voth, P. Salvador, J. J. Dannenberg, S. Dapprich, A. D. Daniels, Ö. Farkas, J. B. Foresman, J. V. Ortiz, J. Cioslowski and D. J. Fox, Gaussian 09, Revision D.01, Gaussian, Inc., Wallingford CT, 2009.
- R5 J. Tomasi, B. Mennucci and E. Cancès, *J. Mol. Struct. Theochem.*, 1999, **464**, 211–226.
- R6 <http://cccbdb.nist.gov>.
- R7 H. Tada, O. Shiho, K. Kuroshima, M. Koyama and K. Tsukamoto, *J. Immunol. Methods*, 1986, **93**, 157–165.

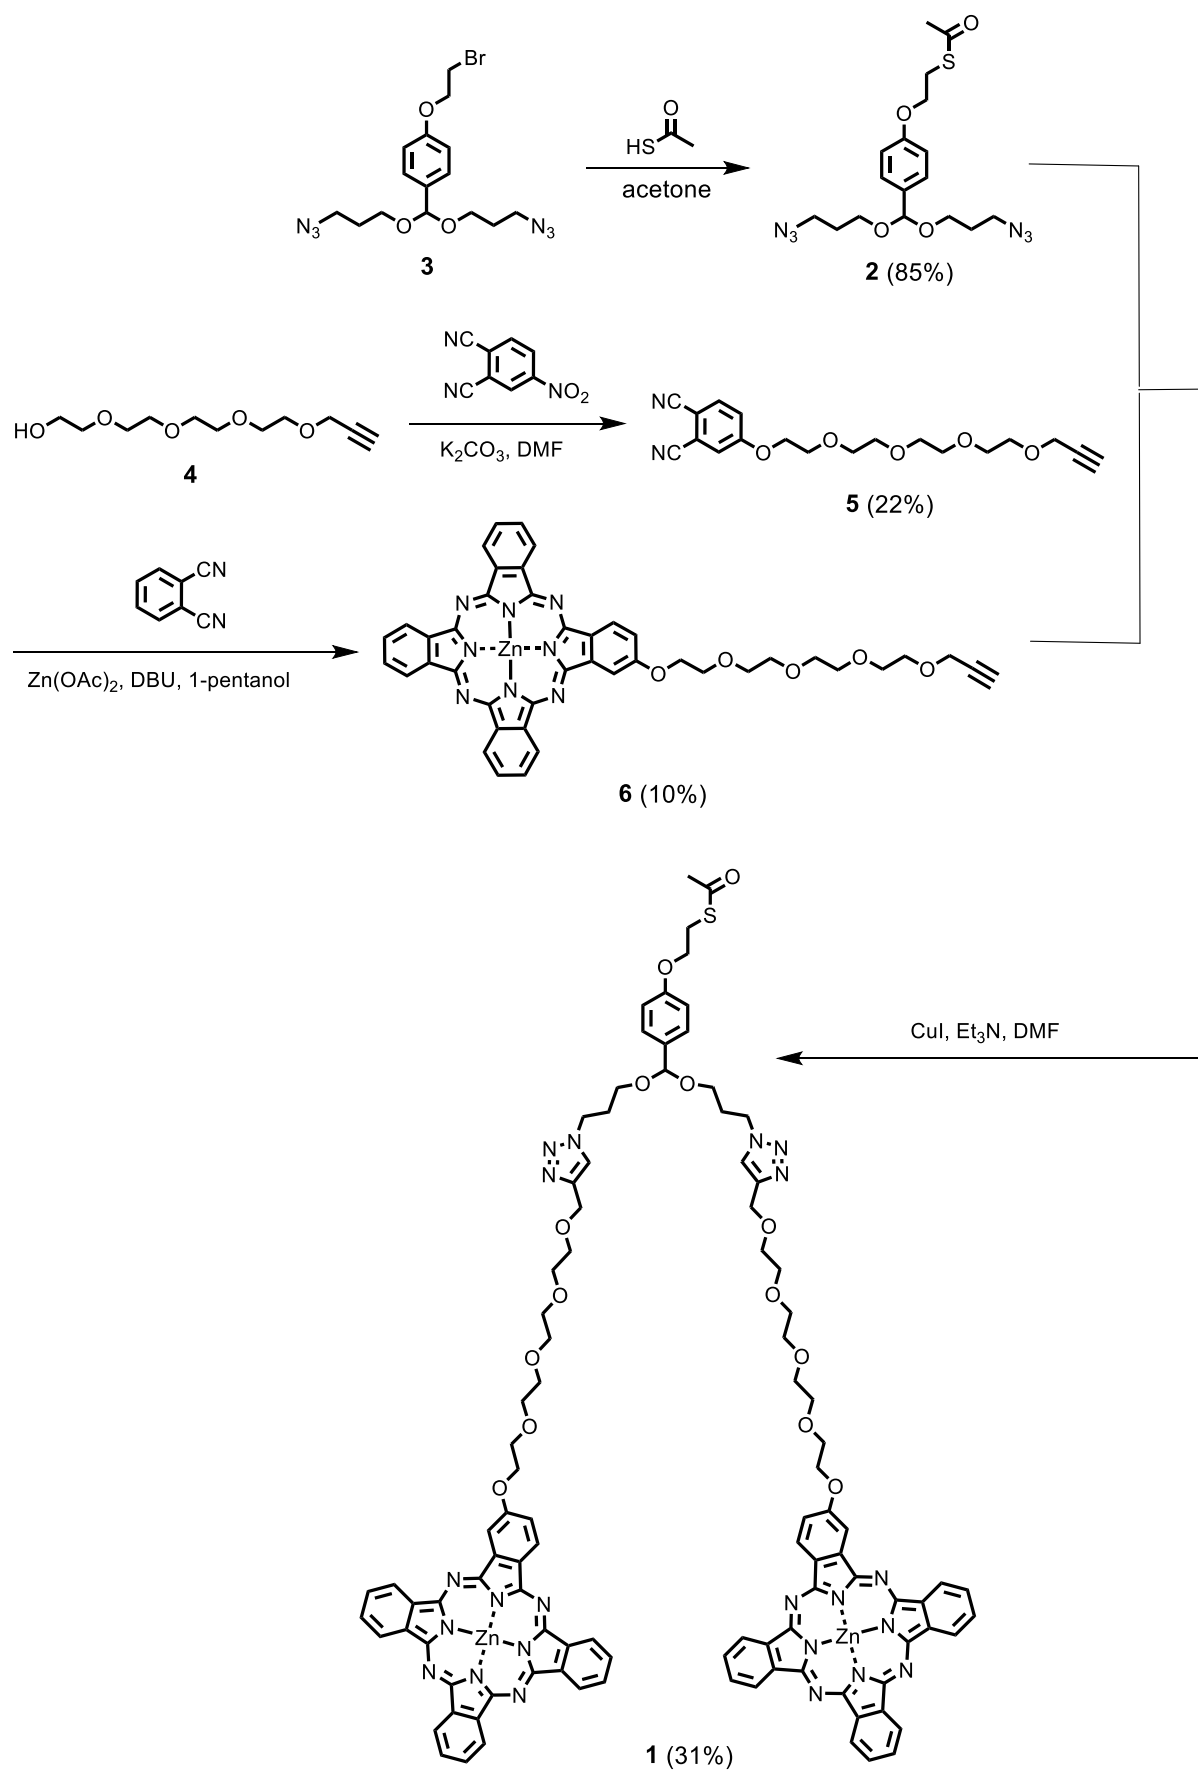

**Scheme S1.** Synthetic route for dimeric phthalocyanine **1**.

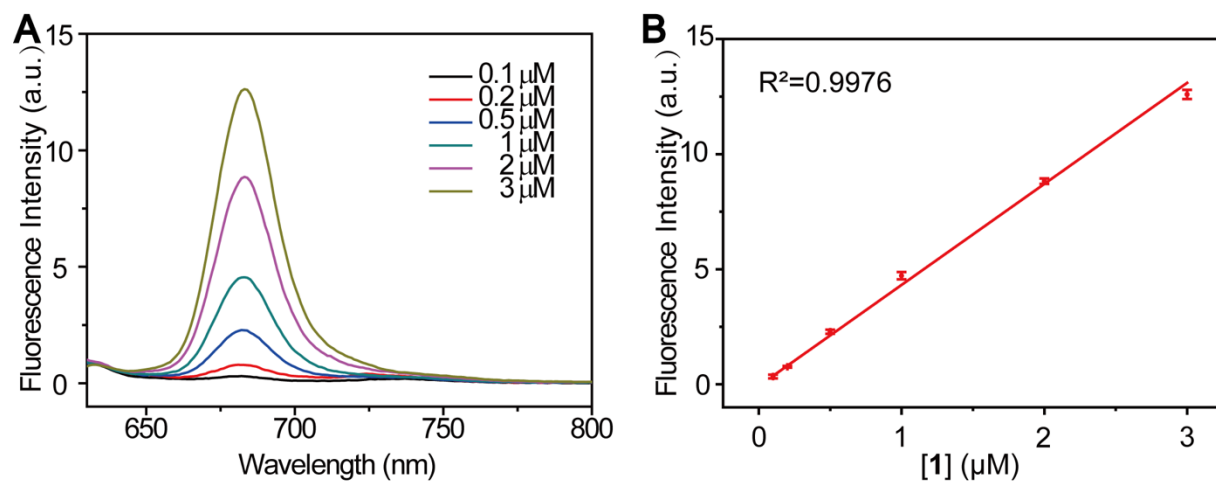

**Fig. S1** (A) Fluorescence spectra of **1** in PBS with 0.3% Tween 80 (v/v) at different concentrations ( $\lambda_{\text{ex}} = 610 \text{ nm}$ ). (B) Plot of the fluorescence intensity at 690 nm versus the concentration of **1** in PBS.

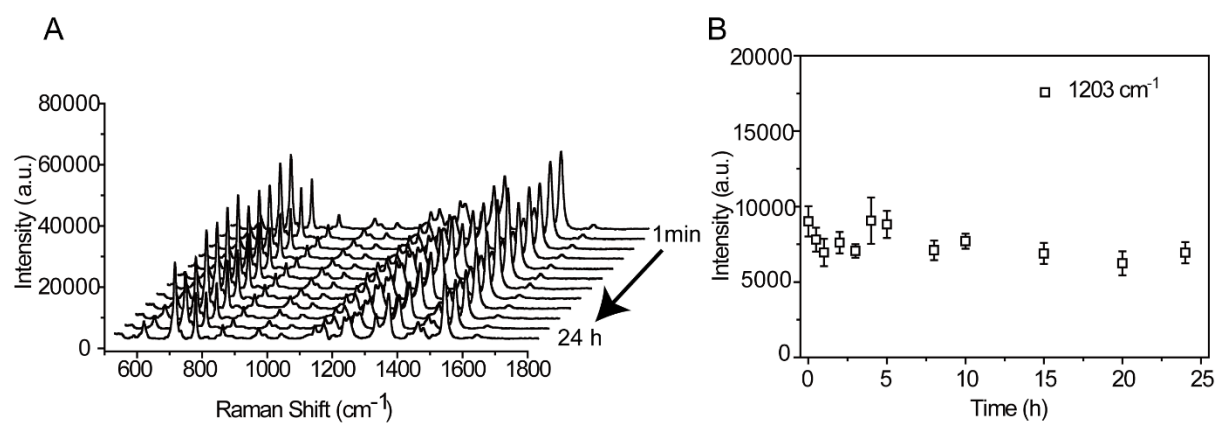

**Fig. S2** (A) Change in SERS spectrum of **1**@AuBP (2.3 nM) in PBS with 0.15% Tween 80 (v/v) over a period of 24 h at room temperature. (B) Variation of the SERS intensity of **1**@AuBP at 1203 cm<sup>-1</sup> over a period of 24 h at room temperature.

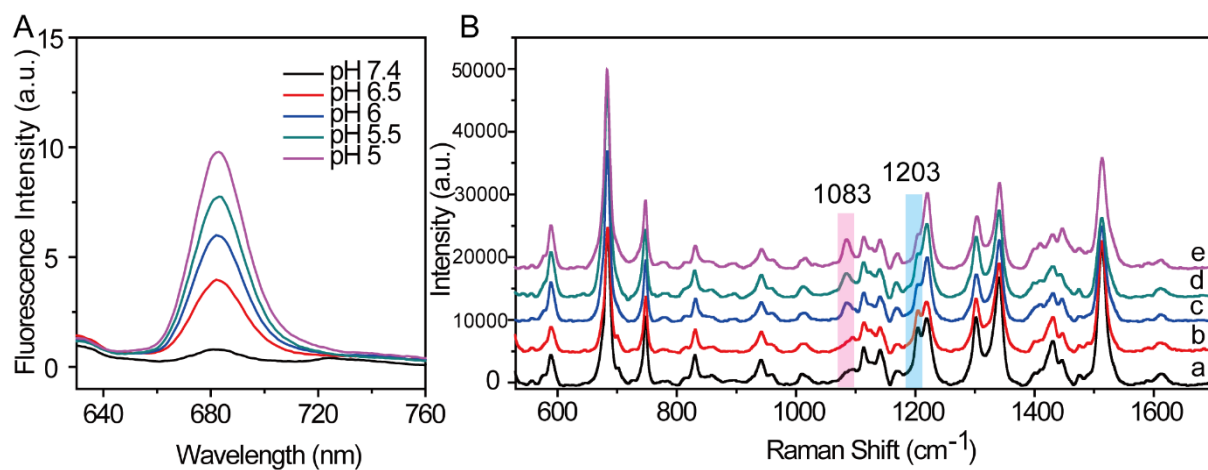

**Fig. S3** (A) Fluorescence ( $\lambda_{\text{ex}} = 610$  nm) and (B) SERS spectra of **1**@AuBP (2.3 nM) in PBS at different pH: (a) 7.4, (b) 6.5, (c) 6, (d) 5.5 and (e) 5. The spectra were recorded at 24 h after adjusting the pH.

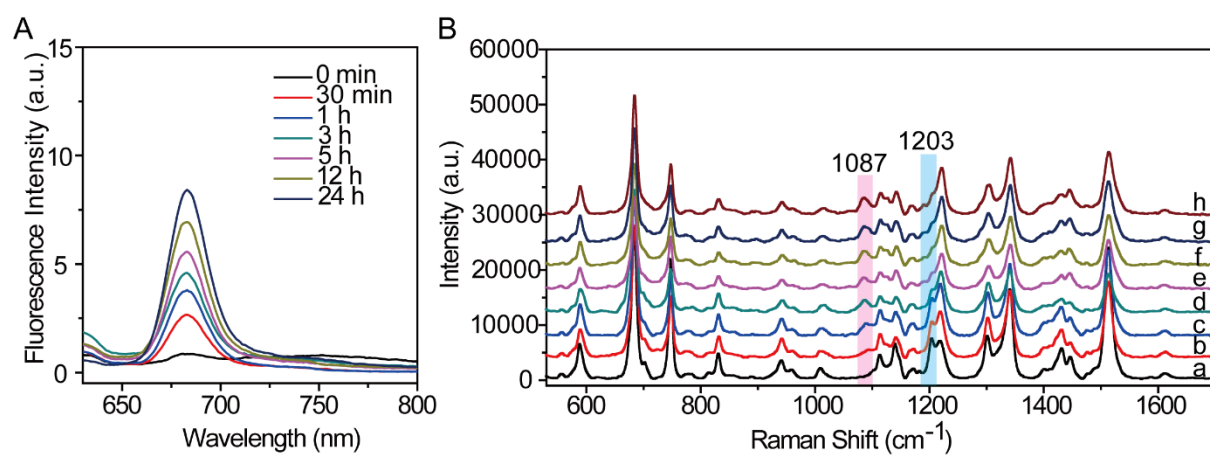

**Fig. S4** Changes in (A) fluorescence ( $\lambda_{\text{ex}} = 610 \text{ nm}$ ) and (B) SERS spectra of **1@AuBP** (2.3 nM) in PBS at pH 5 over a period of 24 h. The SERS spectra were recorded at (a) 0 min, (b) 30 min, (c) 1 h, (d) 2 h, (e) 5 h, (f) 7 h, (g) 12 h and (h) 24 h after preparing the solution.

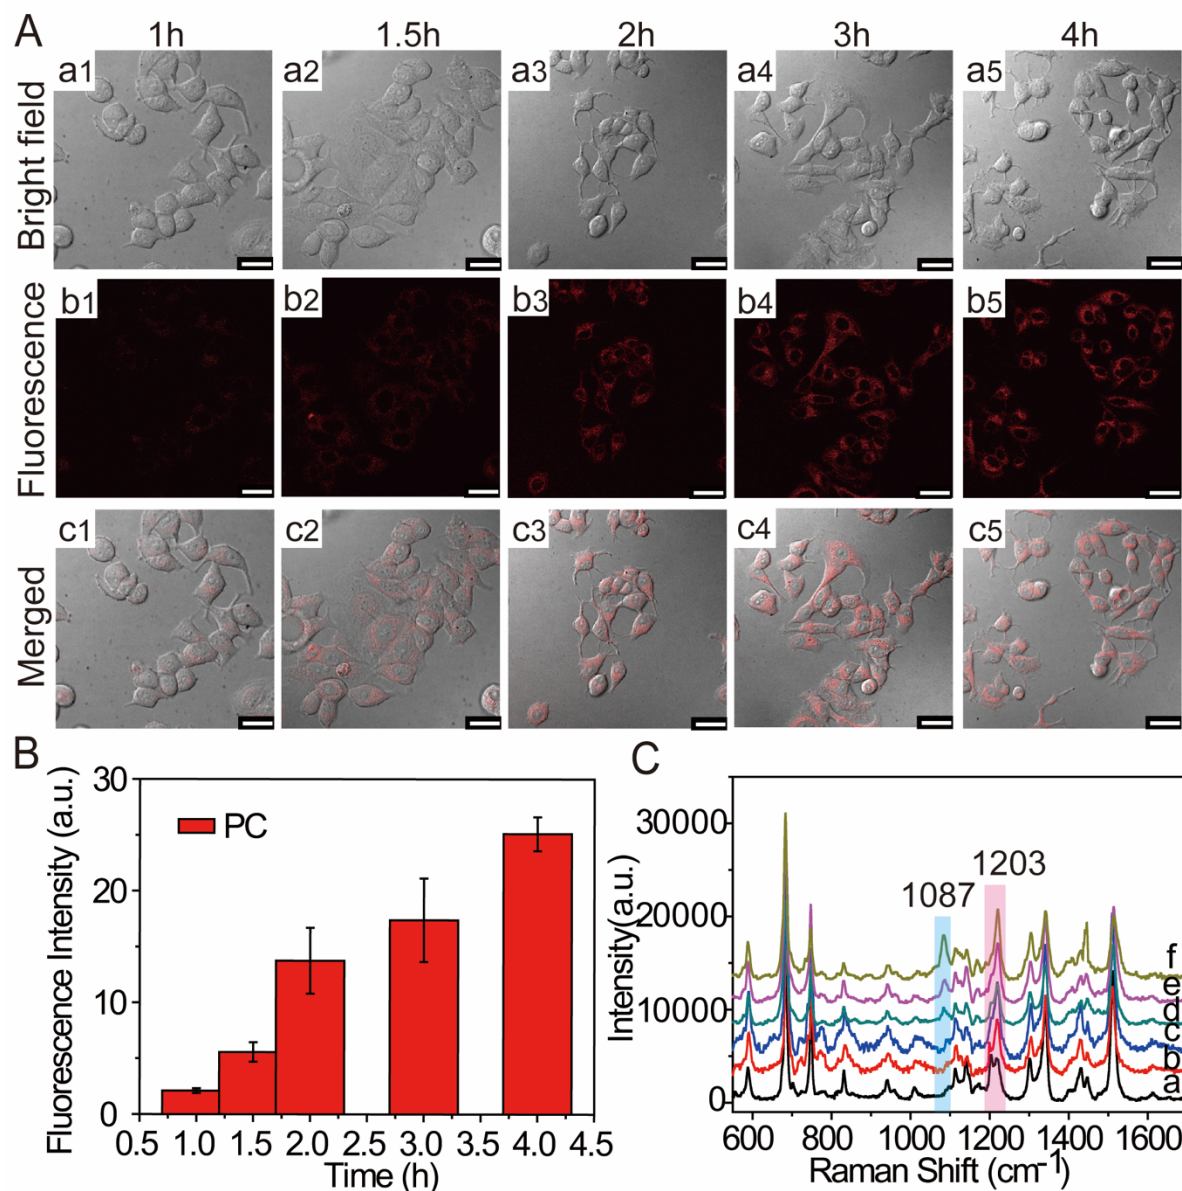

**Fig. S5** (A) Bright-field, fluorescence and the merged confocal images of MCF-7 cells after incubation with **1**@AuBP in PBS at pH 7.4 (2.3 nM, 200  $\mu$ L) for different periods of time. Scale bar: 25  $\mu$ m. (B) Corresponding quantified fluorescence intensities. Data are reported as the mean  $\pm$  standard deviation of three independent experiments. (C) SERS spectra recorded after incubating MCF-7 cells with **1**@AuBP in PBS (2.3 nM, 200  $\mu$ L) for different periods of time: (a) 0 min, (b) 1 h, (c) 1.5 h, (d) 2 h, (e) 3 h and (f) 4 h.

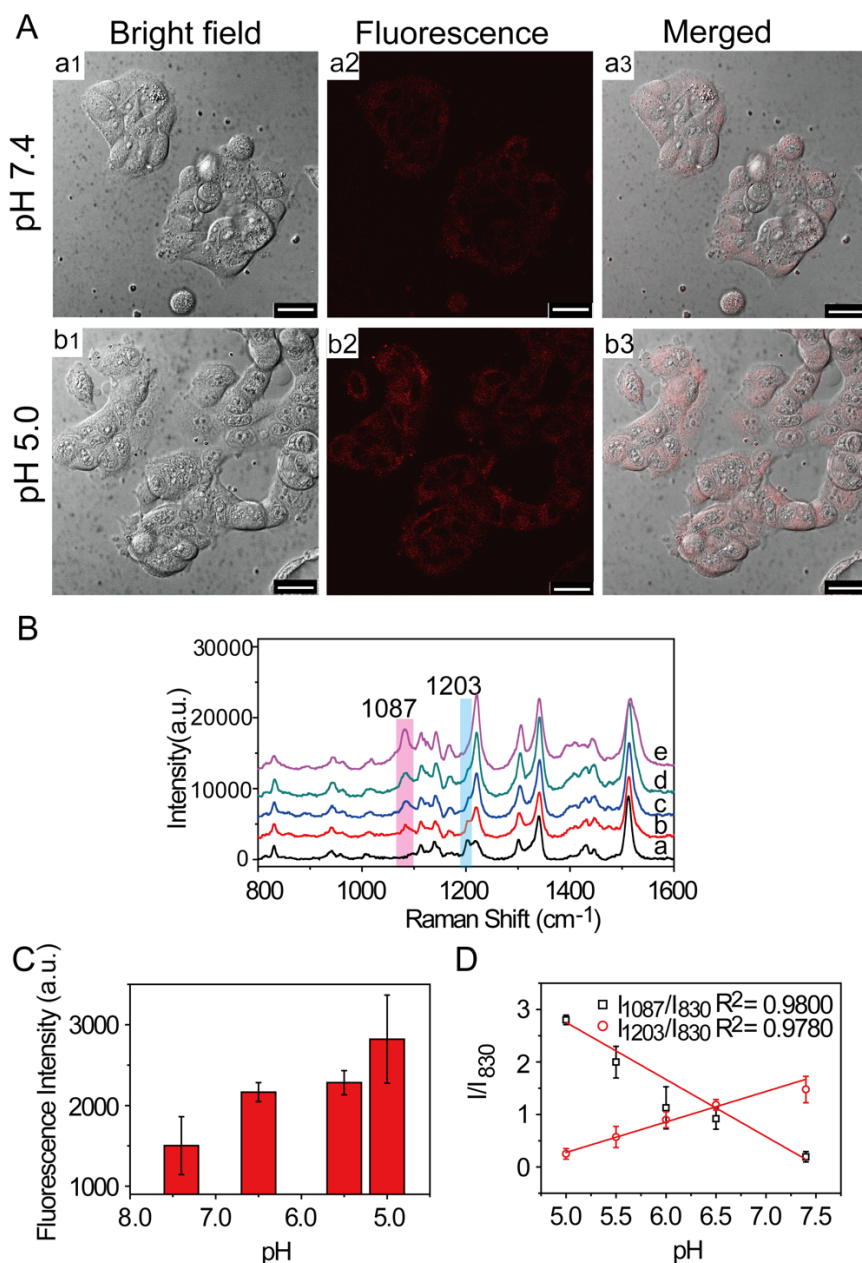

**Fig. S6** (A) Bright-field, fluorescence and the merged confocal images of MCF-7 cells after incubation with nigericin (10 nM) for 30 min, followed by incubation with **1**@AuBP (2.3 nM) in PBS at pH 7.4 or 5.0 for 2 h. Scale bar: 25  $\mu$ m. (B) SERS spectra of MCF-7 cells after incubation with nigericin (10 nM) for 30 min, followed by incubation with **1**@AuBP (2.3 nM) in PBS at pH (a) 7.4, (b) 6.5, (c) 6, (d) 5.5 and (e) 5 for 2 h. (C) Quantified intracellular fluorescence intensities of MCF-7 cells after incubation with nigericin (10 nM) for 30 min, followed by incubation with **1**@AuBP (2.3 nM) in PBS at different pH for 2 h. Data are reported as the mean  $\pm$  standard deviation of three independent experiments. (D) Plots of the ratiometric intensities of  $I_{1087}/I_{830}$  and  $I_{1203}/I_{830}$  versus the pH of the medium.

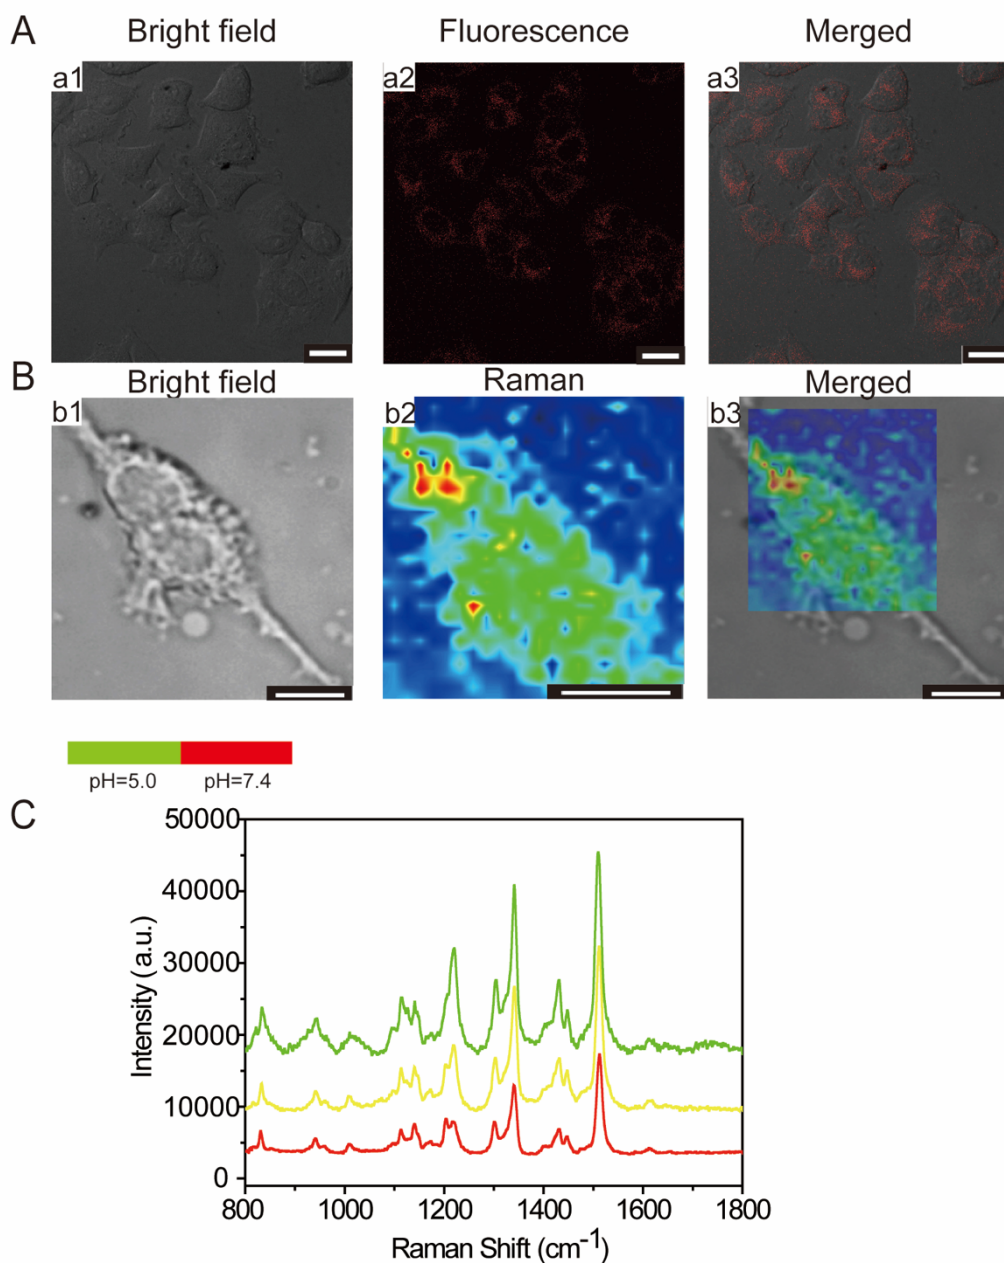

**Fig. S7** (A) Bright-field, fluorescence and the merged confocal images of MCF-7 cells after incubation with nigericin (10 nM) for 30 min, followed by incubation with **1**@AuBP (2.3 nM) in PBS at pH 5.0 for 4 h. Scale bar: 25  $\mu\text{m}$ . (B) The corresponding Raman images. Scale bar: 10  $\mu\text{m}$ . (C) Raman spectra collected in the (a) red, (b) yellow and (c) green colour regions of the MCF-7 cell shown in (B).

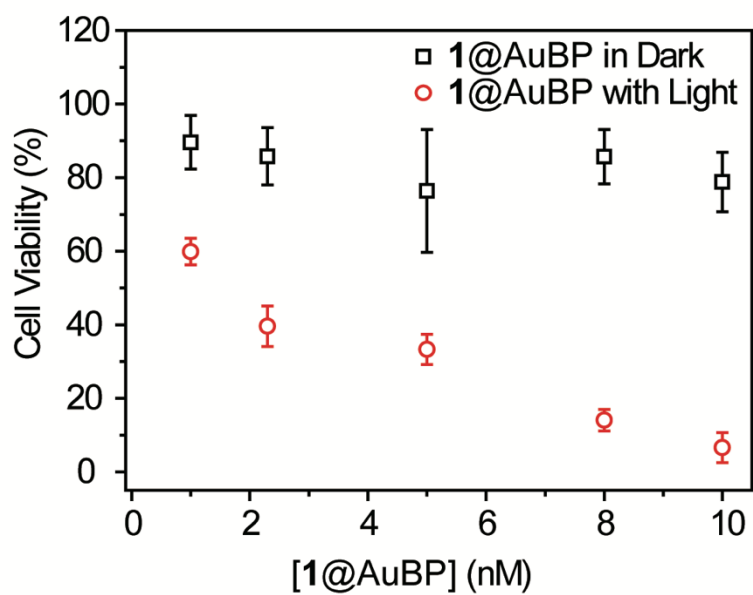

**Fig. S8** Cytotoxicity of 1@AuBP against MCF-7 cells upon incubation for 12 h both in the absence and presence of light ( $\lambda > 610$  nm,  $40 \text{ mW cm}^{-2}$ ,  $48 \text{ J cm}^{-2}$ ). Data are reported as the mean  $\pm$  standard error of the mean of three independent experiments, each performed in quadruplicate.

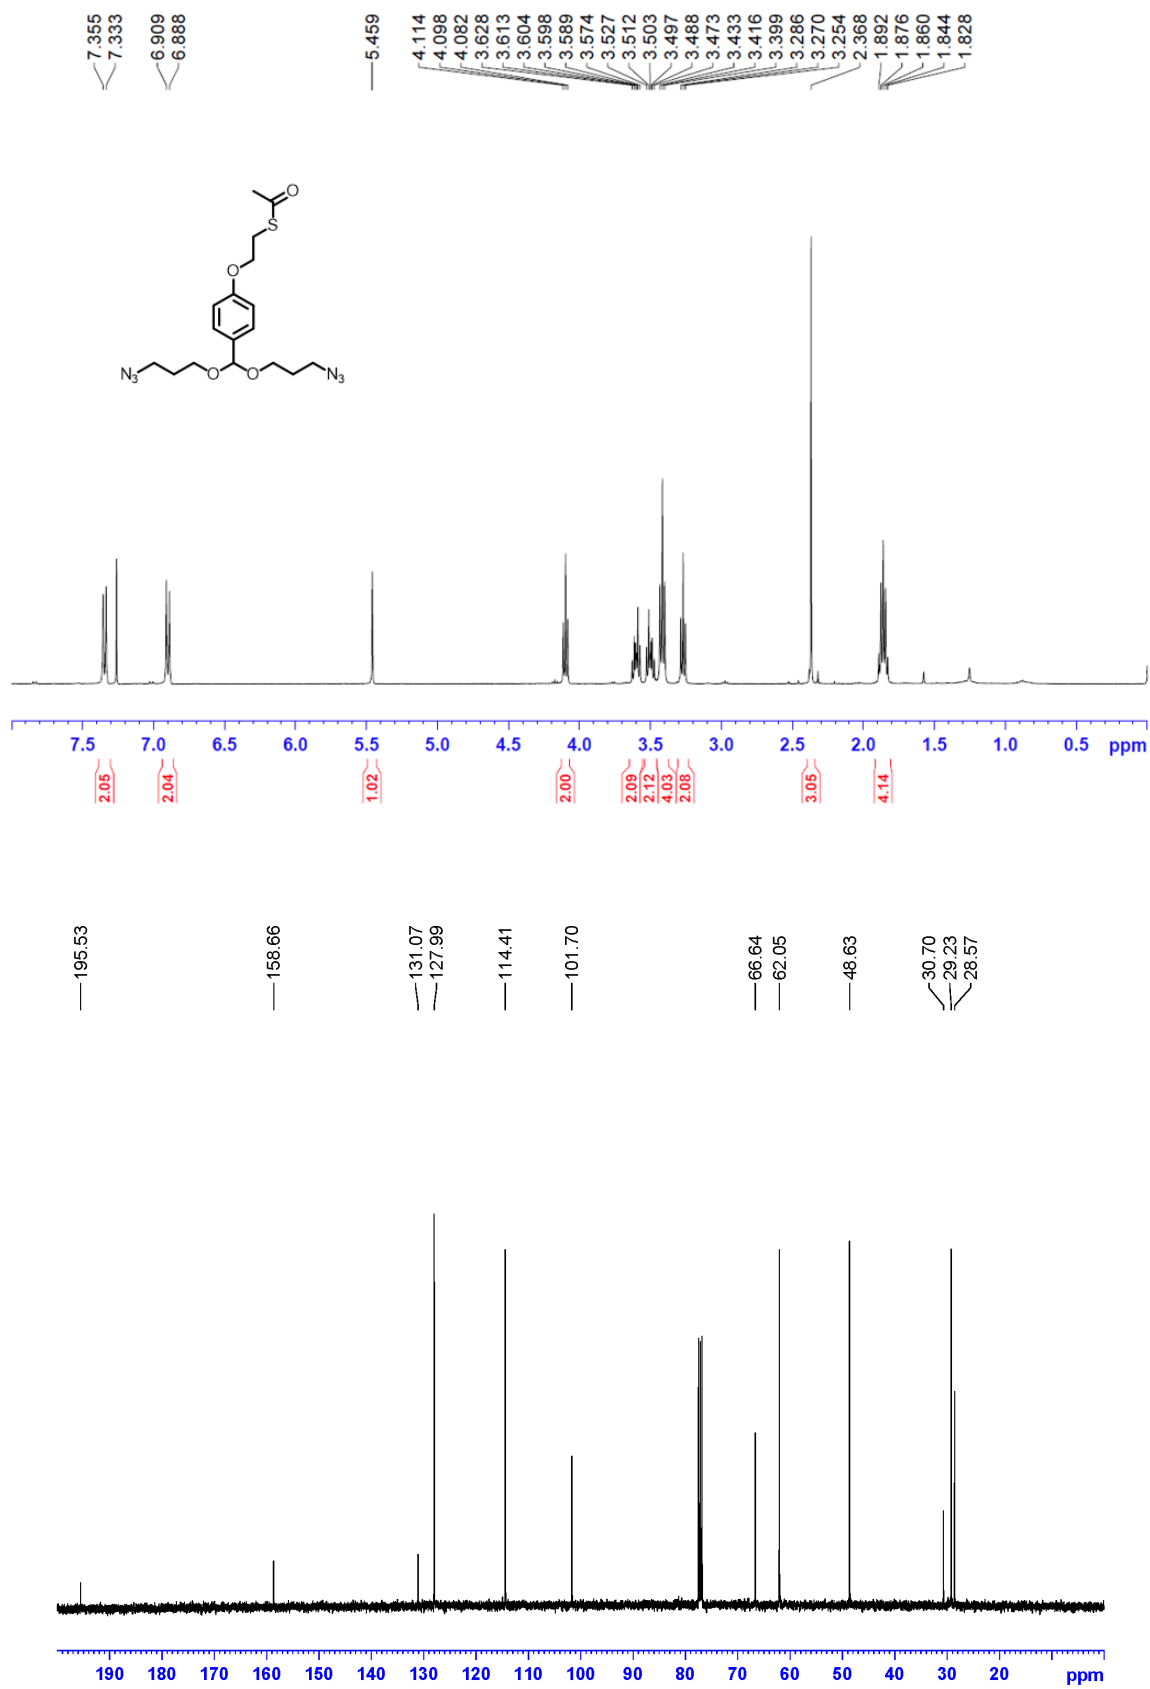

**Fig. S9** <sup>1</sup>H (top) and <sup>13</sup>C{<sup>1</sup>H} (bottom) NMR spectra of **2** in CDCl<sub>3</sub>.

## Thermo QEFMS Analysis Report

### Analysis Info

|               |                                        |                |          |
|---------------|----------------------------------------|----------------|----------|
| Sample Name : | 3                                      | Reference No.: | Wqkpn081 |
| Instrument :  | Q Exactive Focus Orbitrap              |                |          |
| Source :      | HESI II                                | Polarity :     | positive |
| Comment :     | ESI pos, 3.5kV, by LC, with sheath gas |                |          |

### Accurate Mass Measurement

|                                         |                                                                 |
|-----------------------------------------|-----------------------------------------------------------------|
| Molecular formula :                     | C <sub>17</sub> H <sub>24</sub> N <sub>6</sub> O <sub>4</sub> S |
| Experimental Mass [M+Na] <sup>+</sup> : | 431.14681                                                       |
| Theoretical Mass [M+Na] <sup>+</sup> :  | 431.14720                                                       |
| Error (ppm) :                           | 0.9                                                             |

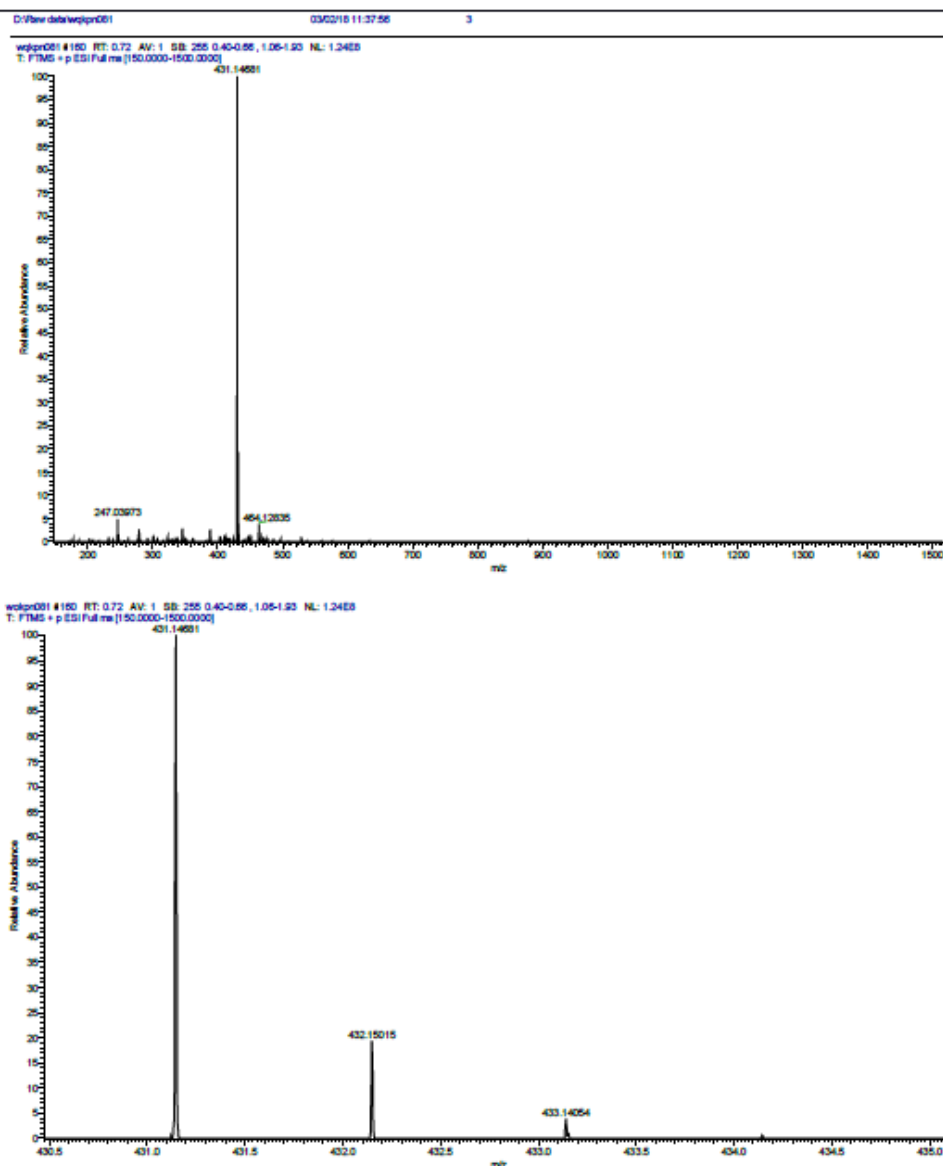

**Fig. S10** ESI mass spectrum of **2**. The isotopic pattern of the M<sup>+</sup> envelope is shown in the lower part.

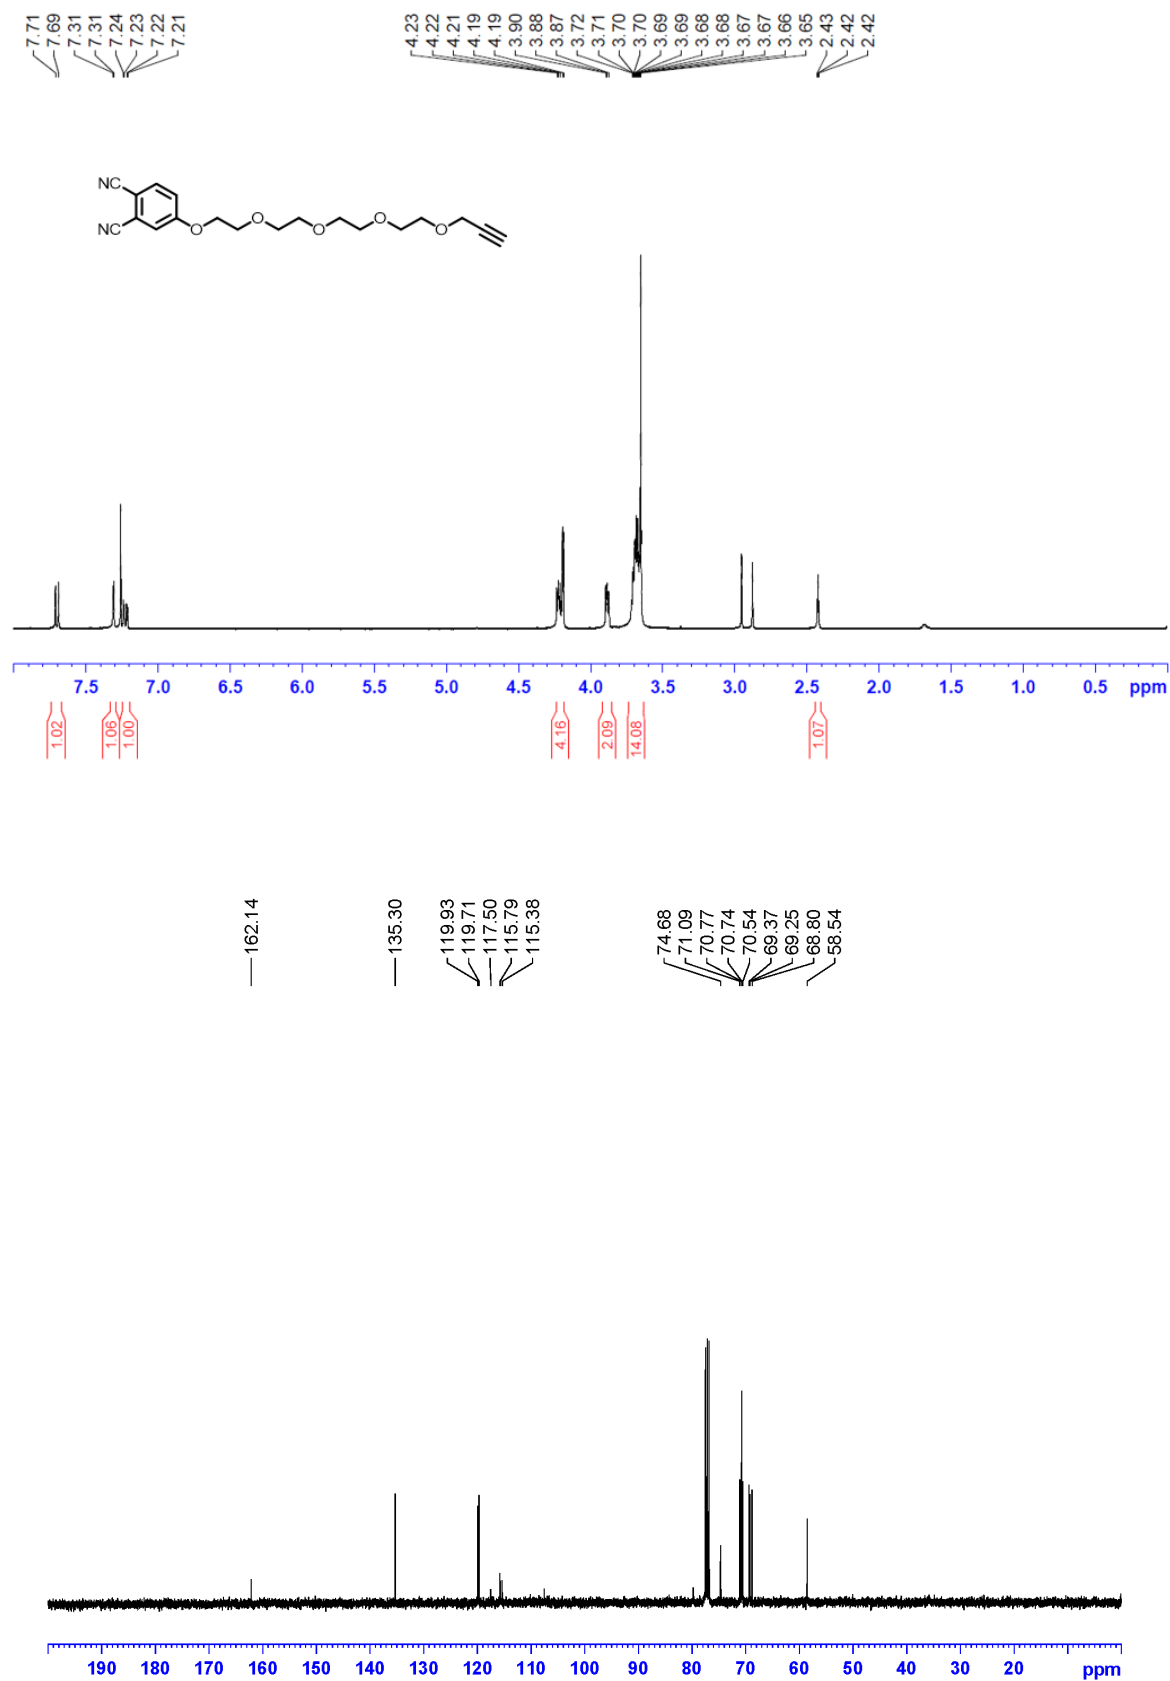

**Fig. S11**  $^1\text{H}$  (top) and  $^{13}\text{C}\{^1\text{H}\}$  (bottom) NMR spectra of **5** in  $\text{CDCl}_3$ .

## Thermo QEFMS Analysis Report

### Analysis Info

|               |                                        |                |          |
|---------------|----------------------------------------|----------------|----------|
| Sample Name : | 1                                      | Reference No.: | Wqkpn079 |
| Instrument :  | Q Exactive Focus Orbitrap              |                |          |
| Source :      | HESI II                                | Polarity :     | positive |
| Comment :     | ESI pos, 3.5kV, by LC, with sheath gas |                |          |

### Accurate Mass Measurement

|                                         |                                                               |
|-----------------------------------------|---------------------------------------------------------------|
| Molecular formula :                     | C <sub>19</sub> H <sub>22</sub> N <sub>2</sub> O <sub>5</sub> |
| Experimental Mass [M+Na] <sup>+</sup> : | 381.14172                                                     |
| Theoretical Mass [M+Na] <sup>+</sup> :  | 381.14209                                                     |
| Error (ppm) :                           | 1.0                                                           |

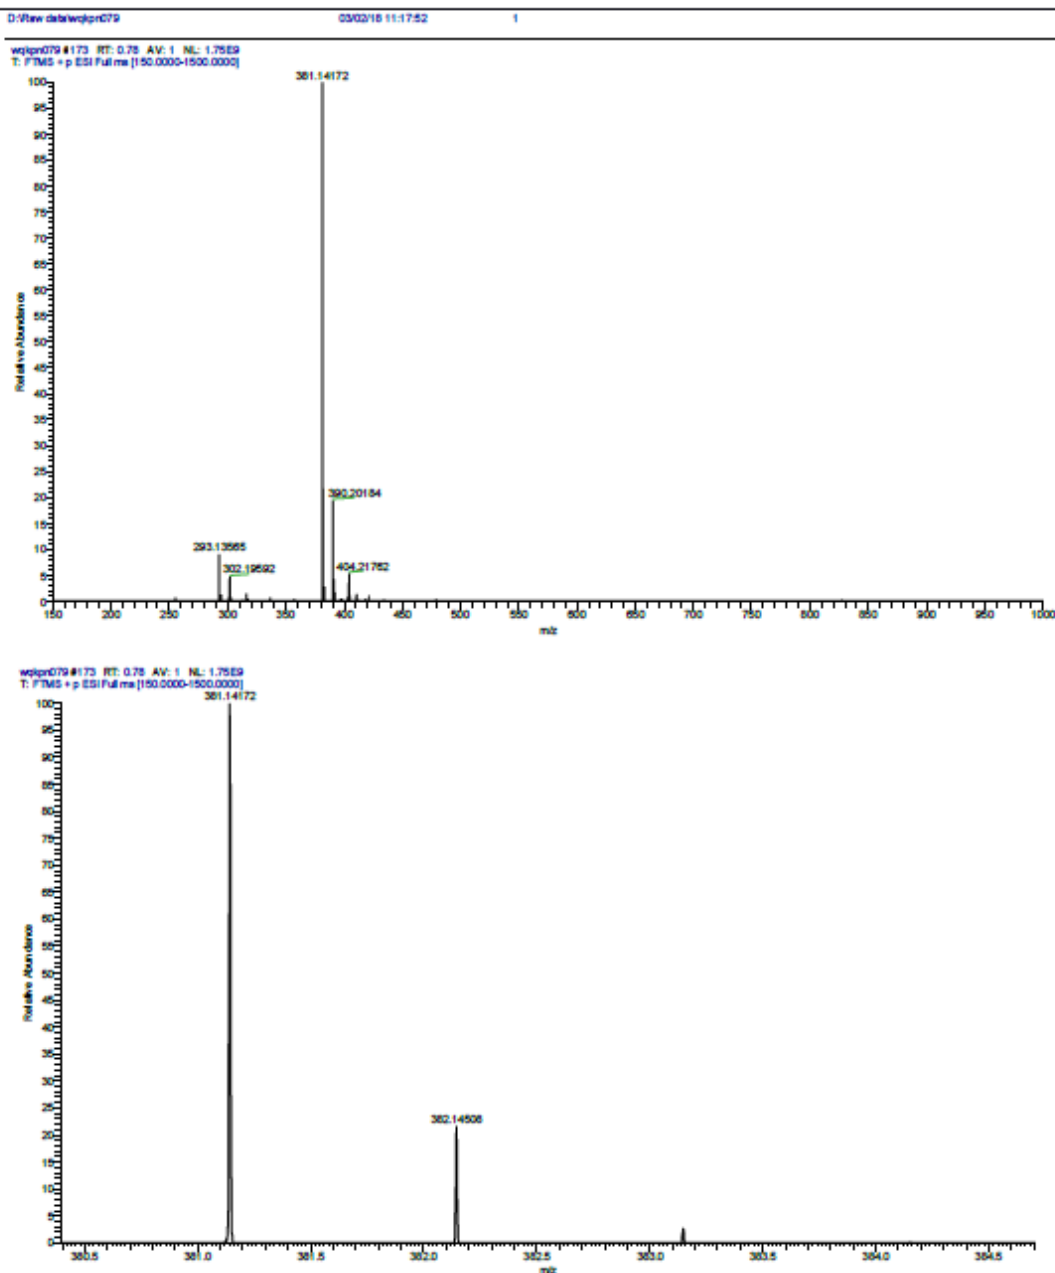

**Fig. S12** ESI mass spectrum of **5**. The isotopic pattern of the  $M^+$  envelope is shown in the lower part.

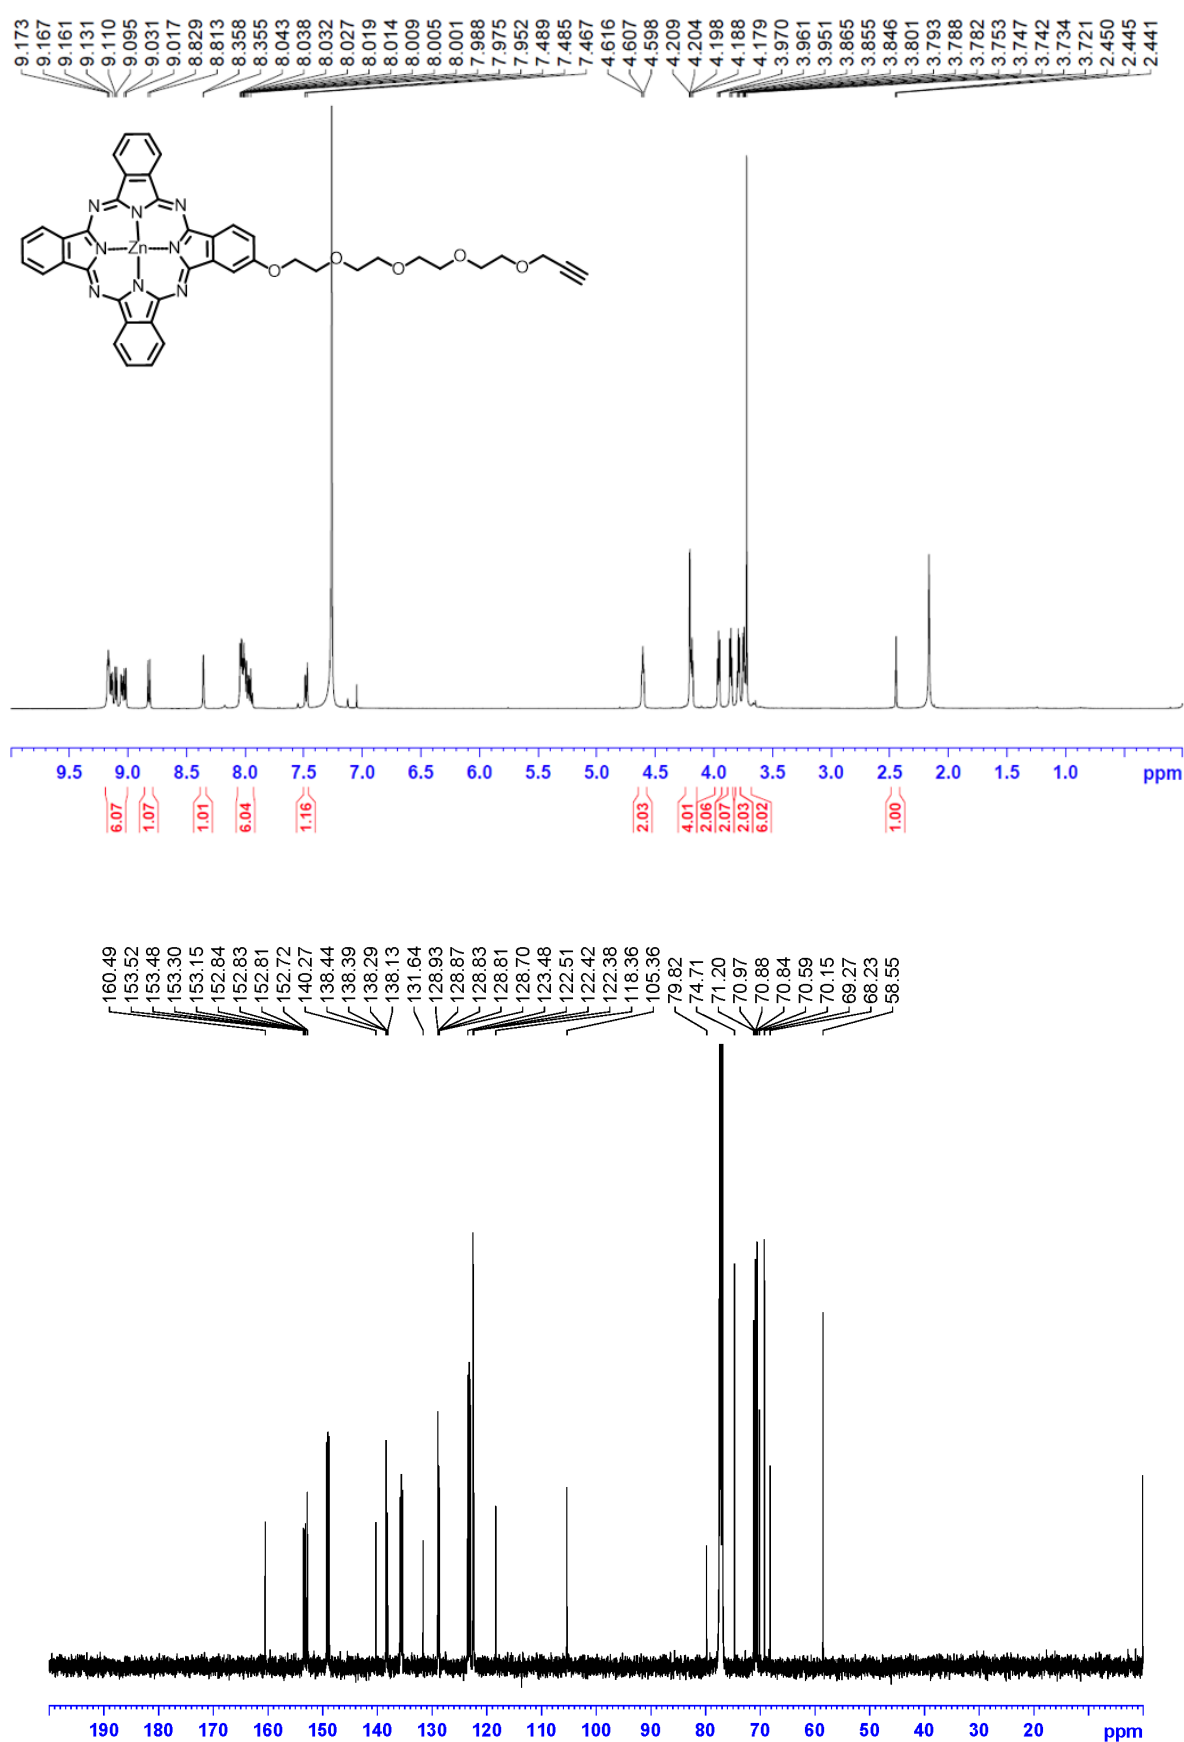

**Fig. S13**  $^1\text{H}$  (top) and  $^{13}\text{C}\{^1\text{H}\}$  (bottom) NMR spectra of **6** in  $\text{CDCl}_3$  with a trace amount of pyridine- $\text{d}_5$ .

## Thermo QEFMS Analysis Report

### Analysis Info

|               |                                        |                |          |
|---------------|----------------------------------------|----------------|----------|
| Sample Name : | 2                                      | Reference No.: | Wqkpn080 |
| Instrument :  | Q Exactive Focus Orbitrap              |                |          |
| Source :      | HESI II                                | Polarity :     | positive |
| Comment :     | ESI pos, 3.5kV, by LC, with sheath gas |                |          |

### Accurate Mass Measurement

|                                         |                                                                  |
|-----------------------------------------|------------------------------------------------------------------|
| Molecular formula :                     | C <sub>43</sub> H <sub>34</sub> N <sub>8</sub> O <sub>5</sub> Zn |
| Experimental Mass [M+Na] <sup>+</sup> : | 829.18302                                                        |
| Theoretical Mass [M+Na] <sup>+</sup> :  | 829.18358                                                        |
| Error (ppm) :                           | 0.7                                                              |

D:\Vane\data\wqkpn080

03/02/18 11:27:54

2

wqkpn080 #253 RT: 1.18 AV: 1 SB: 552 0.08-0.73, 1.75-3.57 NL: 6.20E6  
T: FTMS + p ESI Full ms [150.0000-1500.0000]

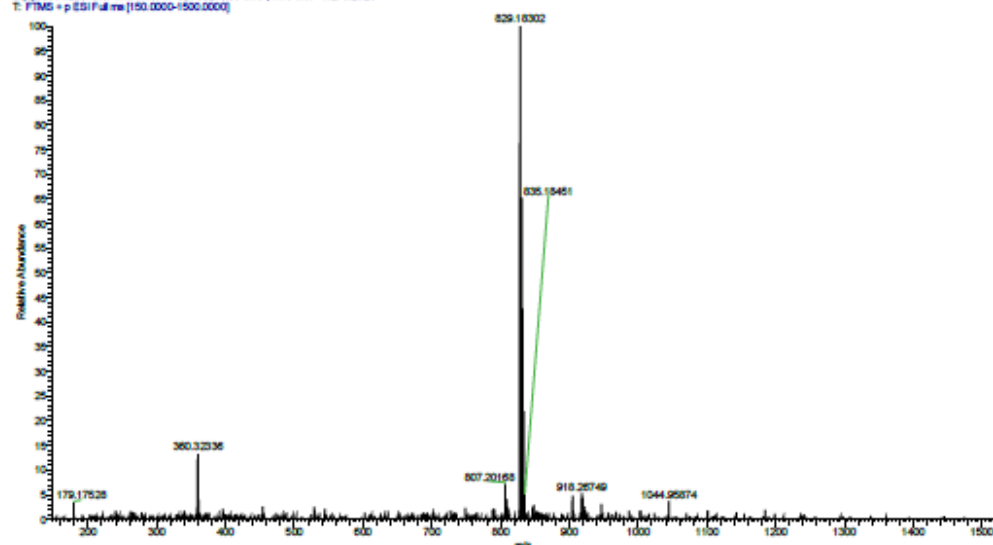

wqkpn080 #253 RT: 1.18 AV: 1 SB: 552 0.08-0.73, 1.75-3.57 NL: 6.20E6  
T: FTMS + p ESI Full ms [150.0000-1500.0000]

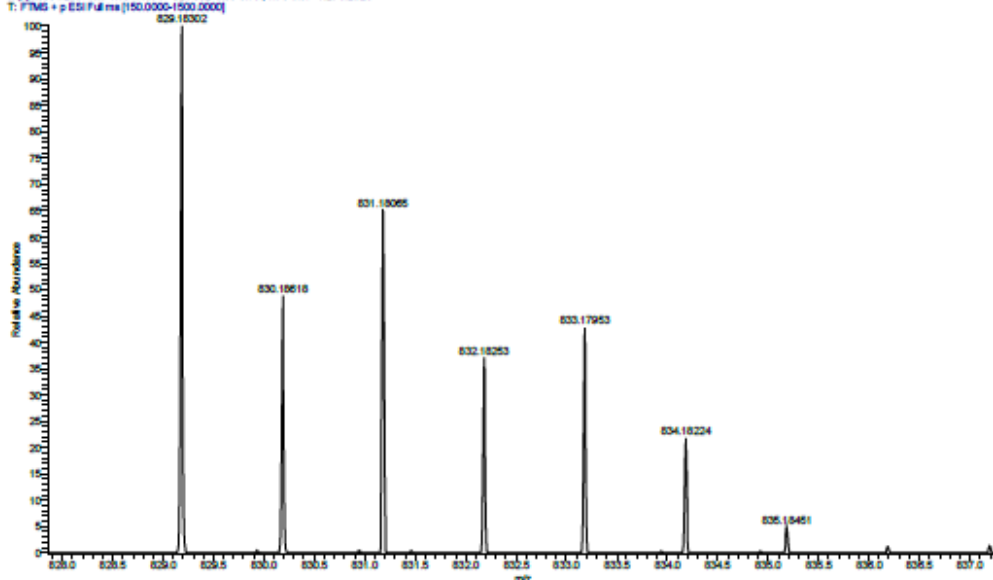

**Fig. S14** ESI mass spectrum of **6**. The isotopic pattern of the M<sup>+</sup> envelope is shown in the lower part.

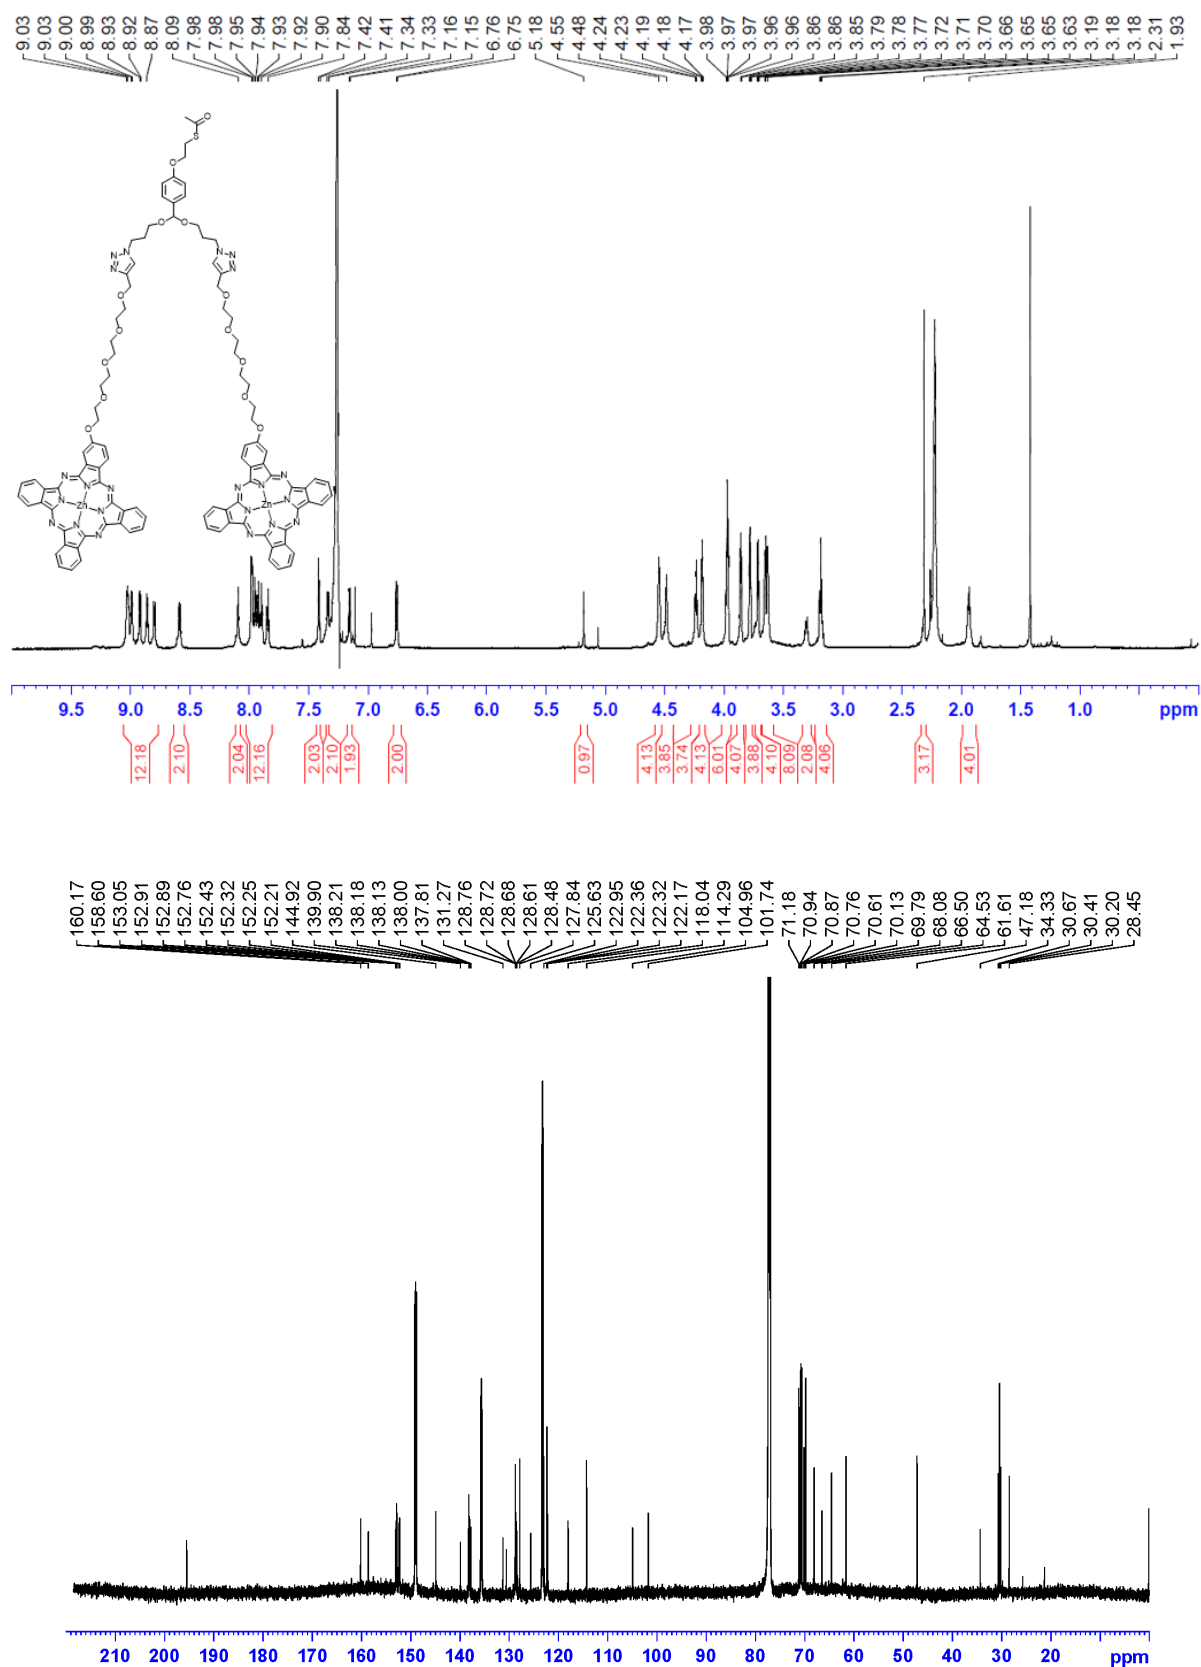

**Fig. S15** <sup>1</sup>H (top) and <sup>13</sup>C{<sup>1</sup>H} (bottom) NMR spectra of **1** in CDCl<sub>3</sub> with a trace amount of pyridine-d<sub>5</sub>.

## Thermo QEFMS Analysis Report

### Analysis Info

|               |                                              |                |          |
|---------------|----------------------------------------------|----------------|----------|
| Sample Name : | 1                                            | Reference No.: | Wqkpn087 |
| Instrument :  | Q Exactive Focus Orbitrap                    |                |          |
| Source :      | HESI II                                      | Polarity :     | positive |
| Comment :     | ESI pos, 3.5kV, by infusion, with sheath gas |                |          |

### Accurate Mass Measurement

|                                                            |                                                                                   |
|------------------------------------------------------------|-----------------------------------------------------------------------------------|
| Molecular formula :                                        | C <sub>103</sub> H <sub>92</sub> N <sub>22</sub> O <sub>14</sub> SZn <sub>2</sub> |
| Experimental Mass [M+Na] <sup>+</sup> , [M] <sup>+</sup> : | 2047.53444, 2024.54788                                                            |
| Theoretical Mass [M+Na] <sup>+</sup> , [M] <sup>+</sup> :  | 2047.53513, 2024.54536                                                            |
| Error (ppm) :                                              | 0.3, 1.2                                                                          |

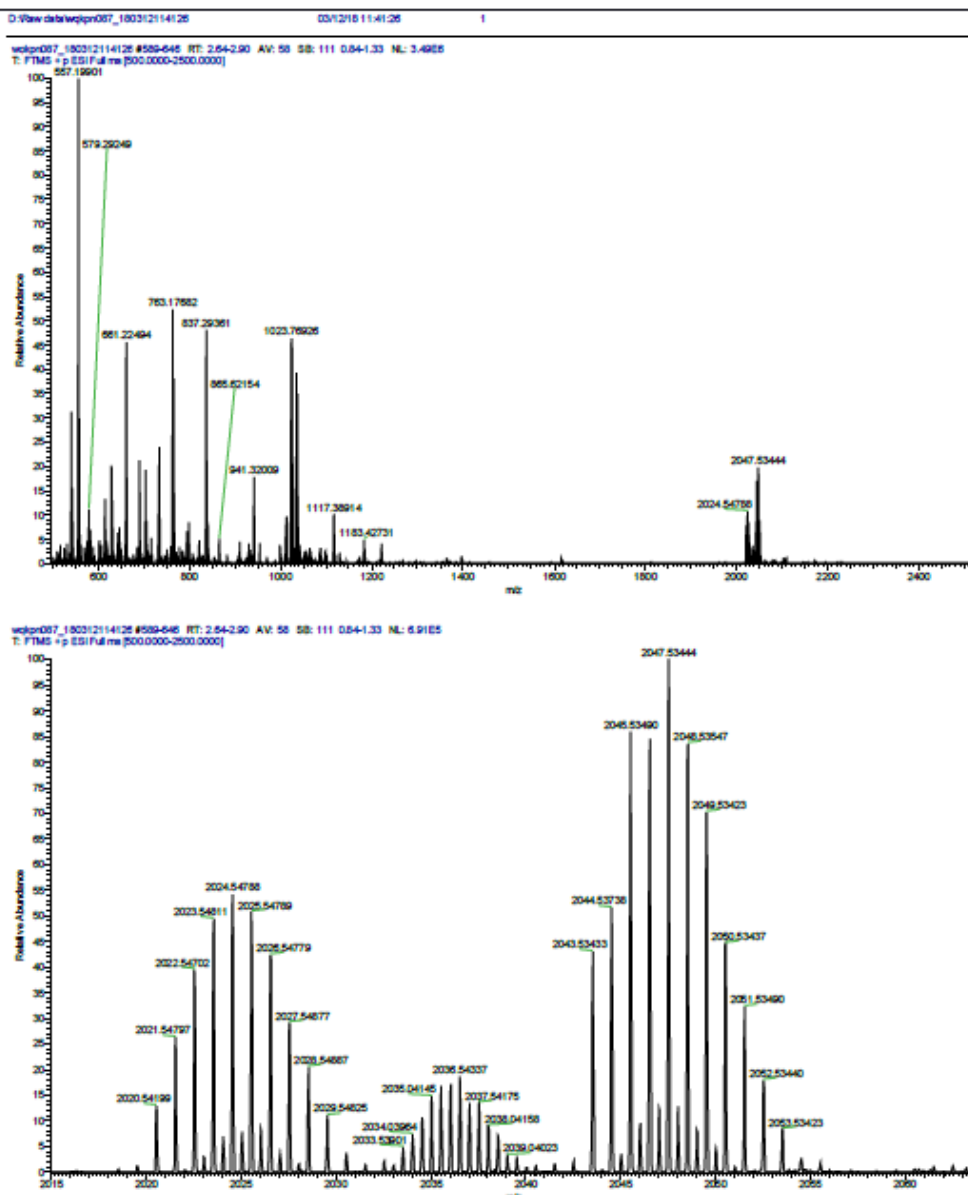

**Table S1.** Experimental and calculated SERS bands of **1@AuBP** and the corresponding assignments.

| Experimental value (cm <sup>-1</sup> ) | Calculated value (cm <sup>-1</sup> ) | Assignment                                                  |
|----------------------------------------|--------------------------------------|-------------------------------------------------------------|
| 588                                    | 597                                  | Pc in-plane symmetric breathing; C-O-C rock                 |
| 683                                    | 678                                  | Pc in-plane symmetric stretching                            |
| 747                                    | 759                                  | Pc in-plane symmetric bending                               |
| 830                                    | 840                                  | Pc in-plane symmetric breathing                             |
| 942                                    | 972                                  | C-O-C asymmetric stretching; Pc in-plane asymmetric bending |
| 1018                                   | 1029                                 | benzene ring symmetric bending                              |
| 1113                                   | 1145                                 | Pc in-plane symmetric bending; CH <sub>2</sub> rocking      |
| 1141                                   | 1173                                 | Pc in-plane symmetric stretching                            |
| 1172                                   | 1212                                 | benzene ring symmetric bending                              |
| 1203                                   | 1234                                 | Pc in-plane symmetric bending                               |
| 1219                                   | 1251                                 | C-O-C asymmetric stretching; benzene ring breathing         |
| 1302                                   | 1312                                 | Pc in-plane symmetric breathing and stretching              |
| 1340                                   | 1360                                 | Pc in-plane symmetric stretching                            |
| 1414                                   | 1452                                 | Pc in-plane symmetric bending                               |
| 1445                                   | 1479                                 | Pc in-plane symmetric bending                               |
| 1513                                   | 1580                                 | Pc in-plane symmetric stretching                            |
| 1614                                   | 1665                                 | benzene ring symmetric stretching                           |
